# Supplementary material for: Functional characterization of plant specific Indeterminate Domain (IDD) transcription factors in tomato (Solanum lycopersicum L.)
Source: Springer Nature journal article supplement (doi:10.1038/s41598-024-58903-0), 2024-04-05
Supplement: 41598_2024_58903_MOESM1_ESM.pdf [file 41598_2024_58903_MOESM1_ESM.pdf]

```

Solyc01g005060_SlIDD12 .....
Solyc01g007120 .....
Solyc01g099340_SlIDD10 .....
Solyc02g062940_SlIDD17 .....
Solyc02g085580_SlIDD1 .....
Solyc03g098070 .....
Solyc03g121660_SlIDD11 .....
Solyc04g008500_SlIDD4 .....
Solyc04g056320_SlIDDb ..... MSFTGDLRH ..... LPPN...
Solyc04g080130_SlIDD18 .....
Solyc05g054030_SlIDD5 .....
Solyc06g062670_SlIDD2 .....
Solyc06g065440 ..... ME
Solyc06g072360_SlIDD9 .....
Solyc06g075250_SlIDD7 .....
Solyc07g053570_SlIDD8 .....
Solyc08g063040_SlIDD16 .....
Solyc08g080850 ..... MEELADKIEIPQKAEDKKDEELEELEDEDEEGEL
Solyc09g007550_SlIDD13 .....
Solyc09g065670_SlIDD15 .....
Solyc09g074780_SlIDD3 .....
Solyc10g084180_SlIDD14 .....
Solyc11g017140 ..... MPSDNHSFTNLN ..... LHEQKWE ..... GSSYLDQEIIRIE
Solyc11g066420 ..... MIQGTSSSANNPQ.NIPLY.S.S
Solyc11g069240_SlIDD6 .....
AT1G03840_MGP/AtIDD3 .....
AT1G14580_BLJ/AtIDD6 .....
AT1G25250_FAL/AtIDD16 .....
AT1G34370_AtSTOP1 ..... METEDDLCNTNWGSSSSKSREPGSSDCGNSTFAGFTSQKWE ..... DASILDYEMGV
AT1G55110_AtIDD7 .....
AT1G68130_AtIDD14 .....
AT2G01940_SGR5/AtIDD15 .....
AT2G02070_RVN/AtIDD5 .....
AT2G02080_IME/AtIDD4 .....
AT2G24990_AtIDDa ..... MEEVVLVTEPPPTIPP ..... VVEYEEHHDDDDDDDL
AT3G13810_AtIDD11 .....
AT3G45260.1_BIB/AtIDD9 .....
AT3G50700_AtIDD2 .....
AT4G02670_AtIDD12 .....
AT5G03150_JKD/AtIDD10 .....
AT5G22890_STOP2 ..... MHIHMNRDEHIAKKVEGSISSFSGE
AT5G37350_AtIDDb ..... MEEVVVVAEPPPKITP ..... FVEYEEHELEDDDD.L
AT5G44160_NUC/AtIDD8 .....
AT5G60470_EGRET/AtIDD13 .....
AT5G66730_ENY/AtIDD1 .....
Os03g0197800_OsIDD1 .....
Os01g0195000_OsIDD2 .....
Os09g0555700_OsIDD3 .....
Os02g0672100_OsIDD4 .....
Os07g0581366_OsIDD5 .....
Os08g0554400_OsIDD6 .....
Os02g0518500_OsIDD7 .....
Os01g0242200_OsIDD8 .....
Os01g0935000_OsIDD9 .....
Os04g0566400_OsIDD10 .....
Os01g0572300_OsIDD11 .....
Os08g0467100_OsIDD12 .....
Os09g0449400_OsIDD13 .....
Os03g0237250_OsIDD14 .....
Os01g0888700_OsIDDa .....
Os01g0871200_OsIDDb ..... MDSGLGRSSETSLKALPSMASNATRNTDPDQQGVRFSSMDQPPCFARFQSFPAFPPLFG
Os03g0838800_OsIDDb ..... MYLEQDEDFSQMIMELCDFDASST
Os04g0165200_ART2 ..... MNPQ ..... E
Os07g0162300_OsIDDe ..... MKRSGRTPTWP .....
Os10g0419200_Ehd2 .....
Os08g0562300_OsIDDe ..... MIPGGGGGGGGGG ..... ISPYLVQ
Os02g0572900_STOP1 ..... MKSTTHLLAGGGGGGSVAPPTAAT
Os12g0170400_DART1 ..... MDRDQMTN ..... TMRDQAANLTSMNPLFYFPMAD

```

Figure S1. Multiple alignment of *IDD*-like transcription factors in Arabidopsis, Tomato and Rice. highly conserved amino acids are indicated in red characters and boxes.

```

Solyc01g005060_S1IDD12 .....MLDN.....
Solyc01g007120 .....MKLDVNVVLRYSKDDFRVLTAVEMGM
Solyc01g099340_S1IDD10 .....MSNSNLSSG..NSSE.....EADET
Solyc02g062940_S1IDD17 .....MNDCVGSG
Solyc02g085580_S1IDD1 .....MPADPDNSSAMNDSTGSG
Solyc03g098070 .....
Solyc03g121660_S1IDD11 .....MKDLMNQQAQVPGVVMEENMSNLTSASG.EASVSSSNR.....NDNNN
Solyc04g008500_S1IDD4 .....M..REE.....ELSQ.....
Solyc04g056320_S1IDDb .....TIGD.....DPMVPLLNLNSAVQTRMDSLQKFLSDSV
Solyc04g080130_S1IDD18 .....MAEIEKSA
Solyc05g054030_S1IDD5 .....MLTSNSFLFG.....A
Solyc06g062670_S1IDD2 .....MSIVTCEEA.AASLSSSS.....NMN
Solyc06g065440 .....QQAN.....QSNENHDF.AGLQEWDPRAMLKSMSFLEQKIHQRLRELVIIV
Solyc06g072360_S1IDD9 .....MT
Solyc06g075250_S1IDD7 .....MMSD..DGLSSLAFI.....Q
Solyc07g053570_S1IDD8 .....MTEEV.....ISN..G
Solyc08g063040_S1IDD16 .....MIKMLGDDSMNS.....LTSASNEASISSTNNR.....IEIGS
Solyc08g080850 .....SWSSDSEIGEALDYLDTKDNSESNVGAFSLQTRRPNAHGGLHTRPNSSALQPLSNRTQKF
Solyc09g007550_S1IDD13 .....MMSG..DLFSIHQ.....Q
Solyc09g065670_S1IDD15 .....
Solyc09g074780_S1IDD3 .....MSNISGEEGSPSSGE.....EAHLH
Solyc10g084180_S1IDD14 .....MMSG..DVFSFPSSV.....KAVLP
Solyc11g017140 .....QQFTGFAKPKHTSEMD.QQGNQNHDT.TRHWDWDPRALNLSFLEQKIHQQLVHLIV
Solyc11g066420 .....NHHPNNN.....IQEDIFSSSSSSSYQQN....SFLFNLSLLKEKVHVQVSLATMFI
Solyc11g069240_S1IDD6 .....MMSN..DGLS.....
AT1G03840_MGP/AtIDD3 .....MTTED.QTSSSSGG
AT1G14580_BLJ/AtIDD6 .....MDLCSFSKNRP...AEKM..SSSYNTIALSSTPTFLLSSAAAAGPG
AT1G25250_FAL/AtIDD16 .....MIHYEQNNLQNL.....
AT1G34370_AtSTOP1 .....PGLQES.....IQANVDFLQGVRAQAWDPRTMLSNLSFMEQKIHQQLVHLIV
AT1G55110_AtIDD7 .....MMMNRDILFHQQQQQ..QMEENMSNLTSASGDQASVSSGNR.....TETSG
AT1G68130_AtIDD14 .....MIDYERSNTTKNINTHHNNPP
AT2G01940_SGR5/AtIDD15 .....MRTDQVMSLNKNNTNCCVV
AT2G02070_RVN/AtIDD5 .....MAASSSSAAS...FFGV..RQD....DQSHLLPPNSSAAAAPP
AT2G02080_IME/AtIDD4 .....MSSSSYNTS...VIPS...SSS....SAQFFFITSS...GTG
AT2G24990_AtIDDa .....SLSSSDIAEALDWLDGKDDDELIGGGFSLHARRPNAHGHSRPNSSSLQPISNKAQKL
AT3G13810_AtIDD11 .....MLLHQHQQP..QQDENMSNLTSASGDQASVSSGNI.....TEASG
AT3G45260.1_BIB/AtIDD9 .....MMMPDDHHPHLPSPSYV.....L
AT3G50700_AtIDD2 .....MPVDLD.....NSSTVSG
AT4G02670_AtIDD12 .....MDMFSSHLSYKLSLSTEASASSGNNTLS..TIQEF
AT5G03150_UKD/AtIDD10 .....MQMIPG..DPFSISSMGGFVHQETHLH
AT5G22890_STOP2 .....TSTSSKQ.....IYVNPVTTGTKSMEDDDVSLSLYLNLSLTHLKHVHQIQLSVFYM
AT5G37350_AtIDDb .....SLSSSDIAEALDWLDGKDDDELIGGGFSLHARRPNAHGHSRPNSSALQPISNKAQKL
AT5G44160_NUC/AtIDD8 .....MTSEVLQTISSSGS
AT5G60470_EGRET/AtIDD13 .....MNQDMMIPHNDRLSFSFV.....H
AT5G66730_ENY/AtIDD1 .....MPVDLD.....NSSTVSG
Os03g0197800_OsIDD1 .....MEVETSSGTAERGA
Os01g0195000_OsIDD2 .....MMLKDLAEIQQQQ.....LLAAAEEN.....LTSA
Os09g0555700_OsIDD3 .....MAAASSAP...FFGL..GD.....TQMPPPPNPTNPA
Os02g0672100_OsIDD4 .....MASNSSAAAVAA...LFGI.RDGDHEDQIKPLFAQQQHHHQPMP
Os07g0581366_OsIDD5 .....GGWSCGGGRSRGD
Os08g0554400_OsIDD6 .....MAAASSAH...YFGL..GE.....PQMQ..QQQQPP
Os02g0518500_OsIDD7 .....MSHTSEESLNNLQ.....QPKLE
Os01g0242200_OsIDD8 .....MATSEAAAI SNPFA
Os01g0935000_OsIDD9 .....MEEFELQQQPYYSK.....LLGSPLEIANVDDSDL
Os04g0566400_OsIDD10 .....MASNSSAAAAAA...FFGISRDGDQHDQIKPLISHQQHQHQQQQLA
Os01g0572300_OsIDD11 .....MFHHHLQQQQQQEE..EEGGGLFLVEEAAEA...ADQQ....QESSM
Os08g0467100_OsIDD12 .....MLSSCAPTAVPPQDASGAAT
Os09g0449400_OsIDD13 .....MLGSCAPT TAGPPPEATTP
Os03g0237250_OsIDD14 .....MALVKSHHQMLASSSTSSSPSSQQQPPP
Os01g0888700_OsIDDa .....MKLDVNALRYSKDDFRVLTAVEMGM
Os01g0871200_OsIDDb .....VQSSSLYLPDDIEAKIGNQFESNPSPNNPTMDWDPQAMLSNLSFLEQKIKQVKDIVQSMS
Os03g0838800_OsIDDC .....TQAR.....HGEEAAAAAAGNARAVLTYLTFLEQKIGHLRGIISSTP
Os04g0165200_ART2 .....FQFFQGV.....EQEMLLLSSHGGGGAAAAASDDVLAHYHVGVLRDKVQQLEPLVGMVV
Os07g0162300_OsIDDe .....MRSTGS.....TARRPNAHGGLSRP...FQPI SNRTQKL
Os10g0419200_Ehd2 .....MLLSDLSDDQEAATGNSHGGGGGDRMVVSHGAAHVVLNLFPLPA
Os08g0562300_OsIDDF .....SQHGHHG.....GVDGMEEEGGGFMGEQPQCHPLLYNLSVLKDRVQQLHPLVLAV
Os02g0572900_STOP1 .....APTLAMEVGGDP...SGALVGGAGGAGAGGGGDARDALLRRLVALGDRMAAVRRRIAASI
Os12g0170400_DART1 .....DALLGMAPP.....PPQQLLP SVSIQHMDWSPDTMLDNLTFIEEKIRQVKDVI R SMA

```

Figure S1. Multiple alignment of *IDD*-like transcription factors in Arabidopsis, Tomato and Rice. highly conserved amino acids are indicated in red characters and boxes.

|                         | 10                                    | 20                       |
|-------------------------|---------------------------------------|--------------------------|
| Solyc01g005060_S1IDD12  | .SSSS.....EALINSGD.....SNR            | KKR...RPAGT.....         |
| Solyc01g007120          | RNHEIVP..CELIDRIARLKHGGTYKVLKLLKHKL   | VHHDKSSKYDGF.....        |
| Solyc01g099340_S1IDD10  | P..YV.....LS..STDGSSAHQQHSQTNNK       | KKR...KLPGN.....         |
| Solyc02g062940_S1IDD17  | EVSVL.....SSGDQTAPCKE.....AAK         | KKR...NLPGM.....         |
| Solyc02g085580_S1IDD1   | EASVS.....SSGNQVVLKE.....SAK          | KKR...NLPGM.....         |
| Solyc03g098070          | .....                                 | .....                    |
| Solyc03g121660_S1IDD11  | NNNNNIYPHHQYNFAPPNQOTOPAAQ.....IK     | KKR...NQPGN.....         |
| Solyc04g008500_S1IDD4   | .....N.....QQENLLQAQ.....APS          | KKR...NQPGT.....         |
| Solyc04g056320_S1IDDb   | NSNT.....LLGQHQMNMVSDIITSAIHQIIVNG    | AALLSSAQLTNP.....        |
| Solyc04g080130_S1IDD18  | EESII.....QQNFP.....VK                | KKR...NLPGN.....         |
| Solyc05g054030_S1IDD5   | PSNYS.....DPFSSPENG.....FIIK          | KKR...RPAGT.....         |
| Solyc06g062670_S1IDD2   | NDTNG.....AFYPPQHQLVTQQ.....IK        | KKR...NQPGN.....         |
| Solyc06g065440          | DHRSLAGIQGSDLSIQQQQLITADLTSIIQLISTA   | GSLLPTVKHQAN..PPTKRLEQ.  |
| Solyc06g072360_S1IDD9   | SSEIN.....ENSCINNNN.....NNK           | KKR...RPAGT.....         |
| Solyc06g075250_S1IDD7   | DPNSN.....PTNNNPNSN.....PSAK          | KKR...NLPKG.....         |
| Solyc07g053570_S1IDD8   | FTHDN.....SIE.....GSNPPPL             | KKR...RNLPGN.....        |
| Solyc08g063040_S1IDD16  | HVLYP.....QLQNIQTQPPP.....NK          | KKR...NLPGN.....         |
| Solyc08g080850          | ANHIRASPLEEWEGRIKVGMSNSVTTAIRGSVRDMA  | IGTKTTEKADR.....         |
| Solyc09g007550_S1IDD13  | QHQQV.....LVEQNPNPKAN.....SSSK        | KKR...NLPGT.....         |
| Solyc09g065670_S1IDD5   | .....MVSNNHHHEQPPK.....IK             | KKR...NLPGN.....         |
| Solyc09g074780_S1IDD3   | TSNNN.....ISSITTSNGSTSQSQQQPLAK       | KKR...NLPGN.....         |
| Solyc10g084180_S1IDD14  | HHHQE.....LQTANPNPKPN.....TSSK        | KKR...NLPGT.....         |
| Solyc11g017140          | GRRGQDEVQGNLDLIVQQQLITADLTSIIIVQLISTA | GSLLPTMKYTLSSAIPAASQLGQ. |
| Solyc11g066420          | TPDNQT..IIHPPPEISISMIIANMGTLIQEITTS   | SSLMFSCQKIVLDSTSLSQNSRY  |
| Solyc11g069240_S1IDD6   | .....CSM.....                         | .....                    |
| AT1G03840_MGP/AtIDD3    | YVQSS.....STTDHVDHHHHDQHESLNPPLV      | KKR...RNLPGN.....        |
| AT1G14580_BLJ/AtIDD6    | PNNFN.....RQEAAMTMVQQOPTSSVAPPPK      | KKR...NQPGN.....         |
| AT1G25250_FAL/AtIDD16   | PSSSS.....NDLLLGING.....ADATHK        | KKR...RPAGT.....         |
| AT1G34370_AtSTOP1       | GRGGQLQGRQDELAAQQQLITDLDLTSIIQLISTA   | GSLLPSVKHNMS..TAPGFPTGQ. |
| AT1G55110_AtIDD7        | SNINQ.....HHQECCFVPOSS.....LK         | KKR...NQPGN.....         |
| AT1G68130_AtIDD14       | PSSSS.....SDLLPDNG.....TAVTQK         | KKR...RPAGT.....         |
| AT2G01940_SGR5/AtIDD15  | SSSSS.....DPFLSSSENGVTTTNTSTQK        | KKR...RPAGT.....         |
| AT2G02070_RVN/AtIDD5    | PPPPH.....HQAPLPPLE.....APPQK         | KKR...NQPRT.....         |
| AT2G02080_IME/AtIDD4    | DNDFN.....RKDTFMSMTQPPNSS..APPK       | KKR...NQPGN.....         |
| AT2G24990_AtIDDa        | TSHVRASPLEGWEGRVKVGMNSVTTAIRGSLRDE    | IGRSRNTDKADR.....        |
| AT3G13810_AtIDD11       | SNYFP.....HHQQQEQQQQQ.....IQ          | KLS...CSWTDLSLFQLEDIVTFL |
| AT3G45260.1_BIB/AtIDD9  | HQEHI.....APNPNPNPNTSS.....NSAK       | KKR...NLPGN.....         |
| AT3G50700_AtIDD2        | EASVSI.....SSTGNQNPSPNS.....TGK       | KKR...NLPGM.....         |
| AT4G02670_AtIDD12       | SGFHN.....VSSVCTHETHK.....PK          | KKR...GLPGN.....         |
| AT5G03150_JKD/AtIDD10   | HLQQQ.....IPDLNPNSNPNPNKPNSSSAK       | KKR...NQPGT.....         |
| AT5G22890_STOP2         | VSTNN.....INQSSGSTSLAVANIGSLVQEIITAA  | SSMLYTCQQQLIGSN.....     |
| AT5G37350_AtIDDb        | TSHVRASPLEGWEGRVKVGMNSVTTAIRGSLRDE    | IGRSRNTDKADR.....        |
| AT5G44160_NUC/AtIDD8    | FAQPQ.....SSS.TLDHDES...LINPPLV       | KKK...RNLPGN.....        |
| AT5G60470_EGRET/AtIDD13 | DQEHI.....TPNPYPNSQFAAST...KTPK       | KKR...NLPGN.....         |
| AT5G66730_ENY/AtIDD1    | DASV.....SSTGNQNLTPKS.....VGK         | KKR...NLPGM.....         |
| Os03g0197800_OsIDD1     | GAGAQ.....QQPPPPQPPQP.....PAK         | KKR...ALPGM.....         |
| Os01g0195000_OsIDD2     | SGDQA.....SVSSHPAPP.....AK            | KKR...SLPGN.....         |
| Os09g0555700_OsIDD3     | LHHHP.....NPSAPVAA.....AAPAPK         | KKR...NQPGN.....         |
| Os02g0672100_OsIDD4     | APSNA.....AAAASAAGSAAGQAAVAAPPK       | KKR...TLP.....           |
| Os07g0581366_OsIDD5     | .ATQS.....DGDGGGARAGG.....GAG         | SGG...GGGGA.....         |
| Os08g0554400_OsIDD6     | LQNN.....AAAPVAA.....TTP.PK           | KKR...NQPGN.....         |
| Os02g0518500_OsIDD7     | A.....CAAGSSKGDVTMPVVK                | KKR...GHPGN.....         |
| Os01g0242200_OsIDD8     | PLTNH.....QQE.....HPPPPPPPA           | KKR...RNLPGT.....        |
| Os01g0935000_OsIDD9     | QLVAG.....VPS.....DPPAPPTA            | VKKKKRSLPGT.....         |
| Os04g0566400_OsIDD10    | ASLTG.....VATAAPTAASSQGAPPAAPPK       | KKR...NLPA.....          |
| Os01g0572300_OsIDD11    | SNLTS.....SASTVPPPPPPSSGNNGNSNK       | KKR...SLPGN.....         |
| Os08g0467100_OsIDD12    | EPFRS.....LQIATAGA.....AAK            | KKR...RPAGT.....         |
| Os09g0449400_OsIDD13    | EPFRS.....LQIATASAG.....SAK           | KKR...RPAGT.....         |
| Os03g0237250_OsIDD14    | PASNS.....SSLAAAAAD.....QSPAK         | KKR...RPPGT.....         |
| Os01g0888700_OsIDDa     | RNHEIVP..AELVDRIAGLKHGGTYKVLRLNLLKKNL | VHHDATKYDGYR.....        |
| Os01g0871200_OsIDDb     | NRESQVAG.GSSEAQAQQLVTDLTCIIQLISTA     | GSLLPSMKNPIS.SNPALRHLSNT |
| Os03g0838800_OsIDDc     | N.....PPPQIVAAELSCIVQLVVIS            | KNLAAARR.....            |
| Os04g0165200_ART2       | VSPAAP..HGQLRRDAAAMAASACSVLQEIITAAA   | SAVAHRLEQANAASS.....     |
| Os07g0162300_OsIDDe     | ASHIRATPLEEWGRMNVGMSNSVTTAIRDSIRETA   | IGRTRNTEKADR.....        |
| Os10g0419200_Ehd2       | AAAAAT...MLLPAAPVMVPAAMAAQAEPRAK      | KKR...SLPGN.....         |
| Os08g0562300_OsIDDF     | AHNAHA...HGPLD...VSAADAIQEIIVAAA      | SSMMYAFOLLCDLGT.....     |
| Os02g0572900_STOP1      | SGESG...PLSSSDIHSVSSEISSAAHLVVLNA     | ASLLSSTVASLP.....        |
| Os12g0170400_DART1      | GRRAS...SSSAATPEQQLVNADLTCILIVQLISTA  | GSLLPSLKNSSFLSRTTPPPAAA. |

Figure S1. Multiple alignment of *IDD*-like transcription factors in Arabidopsis, Tomato and Rice. highly conserved amino acids are indicated in red characters and boxes.

```

Solyc01g005060_SlIDD12 .....
Solyc01g007120 .....
Solyc01g099340_SlIDD10 .....
Solyc02g062940_SlIDD17 .....
Solyc02g085580_SlIDD1 .....
Solyc03g098070 .....
Solyc03g121660_SlIDD11 .....
Solyc04g008500_SlIDD4 .....
Solyc04g056320_SlIDDb ..... P P P P P P P P R P S S S A E L K I N L K S N H K
Solyc04g080130_SlIDD18 .....
Solyc05g054030_SlIDD5 .....
Solyc06g062670_SlIDD2 .....
Solyc06g065440 ..... F G G ..... A S V P S E T G T N . I G A L T C N G Y V P K A K . D Q L S H V D Q M G D C . .
Solyc06g072360_SlIDD9 .....
Solyc06g075250_SlIDD7 .....
Solyc07g053570_SlIDD8 .....
Solyc08g063040_SlIDD16 .....
Solyc08g080850 .....
Solyc09g007550_SlIDD13 .....
Solyc09g065670_SlIDD15 .....
Solyc09g074780_SlIDD3 .....
Solyc10g084180_SlIDD14 .....
Solyc11g017140 ..... V G G ..... V T V P S T A G T S . A G G L T C N D G V A K L E . D Q S N H I D Q L R D C G I
Solyc11g066420 ..... R E P S Q N D V G H G Q G Q G V D H L L Q D Y D W Y V D N Y N S N C N T H E D N K N H V T S S S T I I A S S T
Solyc11g069240_SlIDD6 .....
AT1G03840_MGP/AtIDD3 .....
AT1G14580_BLJ/AtIDD6 .....
AT1G25250_FAL/AtIDD16 .....
AT1G34370_AtSTOP1 ..... P G S ..... A V F P Y V R E A N N V A S Q S Q N N N N C G A R . E F D L P K P V L V D E . .
AT1G55110_AtIDD7 .....
AT1G68130_AtIDD14 .....
AT2G01940_SGR5/AtIDD15 .....
AT2G02070_RVN/AtIDD5 .....
AT2G02080_IME/AtIDD4 .....
AT2G24990_AtIDDa .....
AT3G13810_AtIDD11 .....
AT3G45260.1_BIB/AtIDD9 .....
AT3G50700_AtIDD2 .....
AT4G02670_AtIDD12 .....
AT5G03150_JKD/AtIDD10 .....
AT5G22890_STOP2 ..... N N N N D I D N D Q . . . T V D A M V L E F S R Q E T D P G H D F V Q E S T N L F G V Q E R G Q I S F P . D
AT5G37350_AtIDDb .....
AT5G44160_NUC/AtIDD8 .....
AT5G60470_EGREY/AtIDD13 .....
AT5G66730_ENY/AtIDD1 .....
Os03g0197800_OsIDD1 .....
Os01g0195000_OsIDD2 .....
Os09g0555700_OsIDD3 .....
Os02g0672100_OsIDD4 .....
Os07g0581366_OsIDD5 .....
Os08g0554400_OsIDD6 .....
Os02g0518500_OsIDD7 .....
Os01g0242200_OsIDD8 .....
Os01g0935000_OsIDD9 .....
Os04g0566400_OsIDD10 .....
Os01g0572300_OsIDD11 .....
Os08g0467100_OsIDD12 .....
Os09g0449400_OsIDD13 .....
Os03g0237250_OsIDD14 .....
Os01g0888700_OsIDDa .....
Os01g0871200_OsIDDb ..... L C A P M I L G T N C N L R P S A N D E A T I P D I S K T H D Y E E L M N S L N T T Q A E S D E M M N C Q N P C G G E G
Os03g0838800_OsIDDb ..... G G ..... D D A D A D A K H D G S .....
Os04g0165200_ART2 ..... A S F R R G V A F A D D A H A A G G V Q M F A A G A H G G G Q G G D D E A G A S L F H H H G P P A V G A P T V
Os07g0162300_OsIDDe .....
Os10g0419200_Ehd2 .....
Os08g0562300_OsIDDF ..... A P T T . . A P S Q E T A A A S A V V V K N N D H A A D A G O M E D D H L M Q Q Q W Q Q N G S R O H D Y S S H
Os02g0572900_STOP1 ..... A P P P P P . . . A T T V Q E L P P V V V S . .
Os12g0170400_DART1 ..... A G A ..... A Q A V S L A A G E S S S S A R N N E T N R E D E E E Q M G S P D Y D E L F K V W

```

Figure S1. Multiple alignment of *IDD*-like transcription factors in Arabidopsis, Tomato and Rice. highly conserved amino acids are indicated in red characters and boxes.

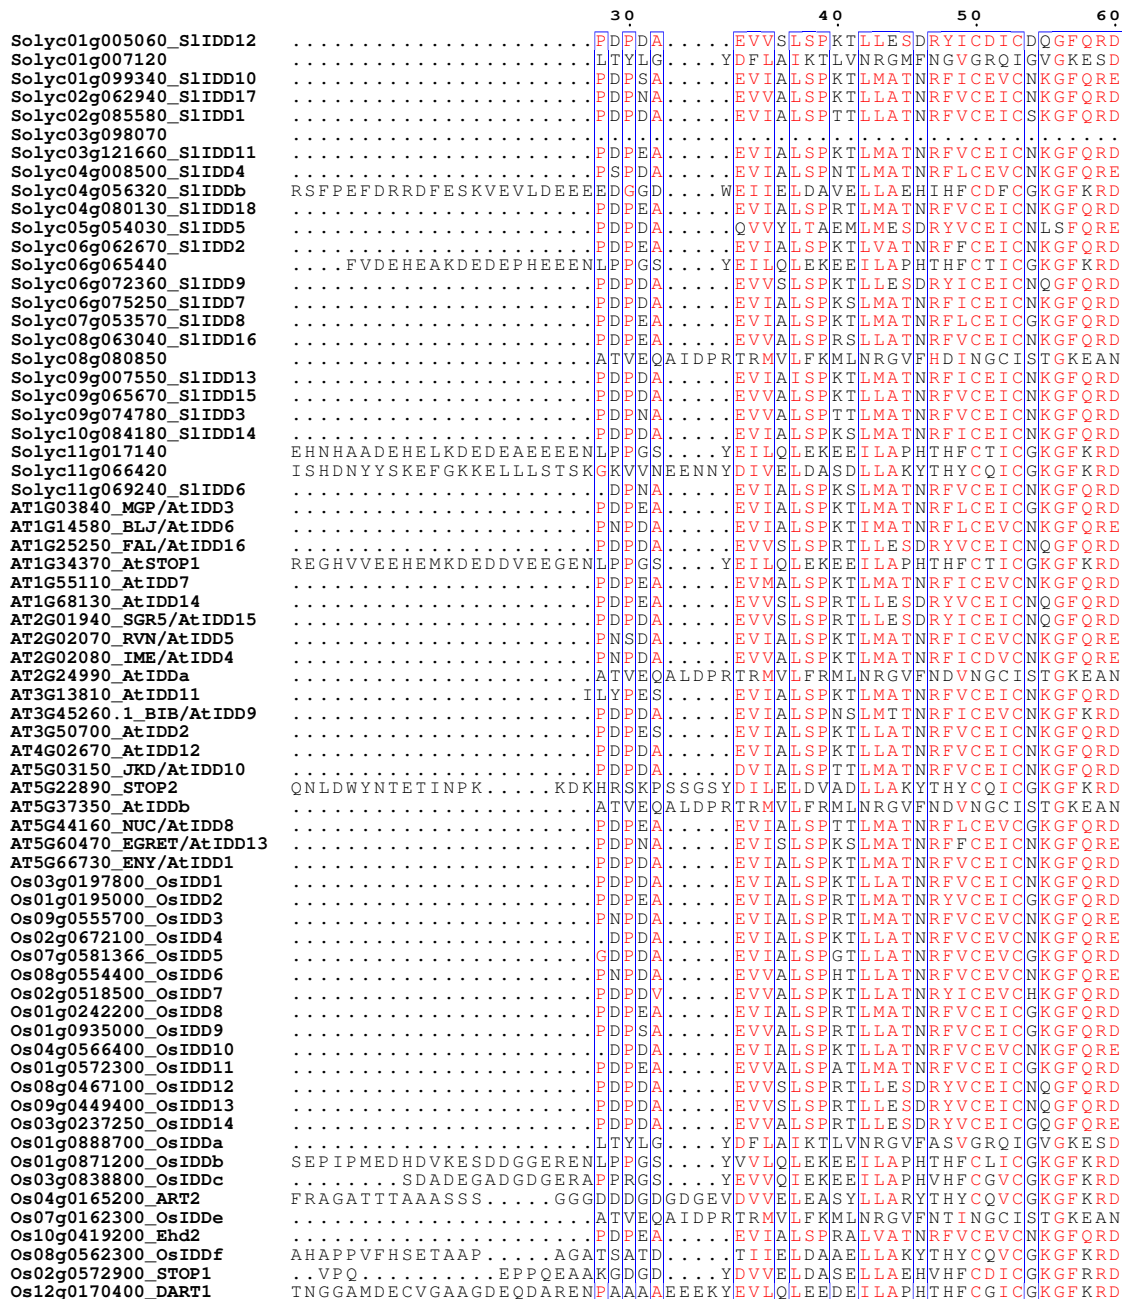

Figure S1. Multiple alignment of *IDD*-like transcription factors in Arabidopsis, Tomato and Rice. highly conserved amino acids are indicated in red characters and boxes.

|                         | 70         | 80      | 90                                       |
|-------------------------|------------|---------|------------------------------------------|
| Solyc01g005060_S1IDD12  | QNLQMHRRRH | KVPWKL  | VVKR...IEV                               |
| Solyc01g007120          | IFEVVKEG   | DTVLAMK | LHRLG...RVSR...AVKSK                     |
| Solyc01g099340_S1IDD10  | QNLQLHRRGH | NLPWKL  | KQK...S.NEI                              |
| Solyc02g062940_S1IDD17  | QNLQLHRRGH | NLPWKL  | RQR...SNEV                               |
| Solyc02g085580_S1IDD1   | QNLQLHRRGH | NLPWKL  | RQR...SNEV                               |
| Solyc03g098070          | ...MHRRRH  | KVPWKL  | LKRET...PIV                              |
| Solyc03g121660_S1IDD11  | QNLQLHRRGH | NLPWKL  | KQRT...SKEIR                             |
| Solyc04g008500_S1IDD4   | QNLQLHRRGH | NLPWKL  | KQKN...TKEVA                             |
| Solyc04g056320_S1IDDb   | ANLRMHRAH  | GNQYK   | TPAALAKPEK...CIDSSNSN                    |
| Solyc04g080130_S1IDD18  | QNLQLHRRGH | NLPWKL  | RQR...SNEV                               |
| Solyc05g054030_S1IDD5   | QNLQMHRRRH | KVPWKL  | KKKEEKNE...MDQVI                         |
| Solyc06g062670_S1IDD2   | QNLQLHRRGH | NLPWKL  | KKRE...NKEV                              |
| Solyc06g065440          | ANLRMHMRGH | GDEYKT  | SAALIKP...QKD...SSSGTTLIKR...YSCPIGCK    |
| Solyc06g072360_S1IDD9   | QNLQMHRRRH | KVPWKL  | LKRET...PIV                              |
| Solyc06g075250_S1IDD7   | QNLQLHRRGH | NLPWKL  | KQRN...KNEVI                             |
| Solyc07g053570_S1IDD8   | QNLQLHRRGH | NLPWKL  | KQRN...SKEV                              |
| Solyc08g063040_S1IDD16  | QNLQLHRRGH | NLPWKL  | KQRS...NKEV                              |
| Solyc08g080850          | VYHATKADG  | QELAIKV | YKTS...VLVFKDRDRYVQGDYRFR                |
| Solyc09g007550_S1IDD13  | QNLQLHRRGH | NLPWKL  | KQRN...KQEI                              |
| Solyc09g065670_S1IDD15  | QNLQLHRRGH | NLPWKL  | KQRN...NKEN                              |
| Solyc09g074780_S1IDD3   | QNLQLHRRGH | NLPWKL  | KQRN...T.AEV                             |
| Solyc10g084180_S1IDD14  | QNLQLHRRGH | NLPWKL  | KQRN...KLEQ                              |
| Solyc11g017140          | ANLRMHMRGH | GDEYKT  | PAALAKP...HKE...PSSEPTLTKR...YSCPIVGCCK  |
| Solyc11g066420          | ANLRMHRAH  | GDEYKS  | SAALSNPMKRI...NDLTSDDGSLKSSSNTIKYSQPEGCR |
| Solyc11g069240_S1IDD6   | QNLQLHRRGH | NLPWKL  | KQRN...NKEVI                             |
| AT1G03840_MGP/AtIDD3    | QNLQLHRRGH | NLPWKL  | KQRN...SKEV                              |
| AT1G14580_BLJ/AtIDD6    | QNLQLHRRGH | NLPWKL  | KQRS...NKEV                              |
| AT1G25250_FAL/AtIDD16   | QNLQMHRRRH | KVPWKL  | LKRDKD...EEV                             |
| AT1G34370_AtSTOP1       | ANLRMHMRGH | GDEYKT  | PAALAKP...NKEV                           |
| AT1G55110_AtIDD7        | QNLQLHRRGH | NLPWKL  | KQRS...NKDV                              |
| AT1G68130_AtIDD14       | QNLQMHRRRH | KVPWKL  | LKRETN...EEV                             |
| AT2G01940_SGR5/AtIDD15  | QNLQMHRRRH | KVPWKL  | LKRDNN...IEV                             |
| AT2G02070_RVN/AtIDD5    | QNLQLHRRGH | NLPWKL  | KQRS...TKEV                              |
| AT2G02080_IME/AtIDD4    | QNLQLHRRGH | NLPWKL  | KQRS...TKEV                              |
| AT2G24990_AtIDDa        | VYHATKSDG  | SELAIKV | YKTS...VLVFKDRDRYVQGDYRFR                |
| AT3G13810_AtIDD11       | QNLQLHRRGH | NLPWKL  | KQRS...NKEV                              |
| AT3G45260.1_BIB/AtIDD9  | QNLQLHRRGH | NLPWKL  | KQRN...NKEV                              |
| AT3G50700_AtIDD2        | QNLQLHRRGH | NLPWKL  | KQRS...NKEV                              |
| AT4G02670_AtIDD12       | QNLQLHRRGH | NLPWKL  | KQRS...TKEQ                              |
| AT5G03150_UKD/AtIDD10   | QNLQLHRRGH | NLPWKL  | KQRS...KQEI                              |
| AT5G22890_STOP2         | ANLRMHRAH  | GDEYKT  | TREALISPTS...QDKKGGYSLKHHY...YSCPIHGCR   |
| AT5G37350_AtIDDb        | VYHATKSDG  | SELAIKV | YKTS...VLVFKDRDRYVQGDYRFR                |
| AT5G44160_NUC/AtIDD8    | QNLQLHRRGH | NLPWKL  | KQRN...SKEV                              |
| AT5G60470_EGRET/AtIDD13 | QNLQLHRRGH | NLPWKL  | KQRS...NKNQV                             |
| AT5G66730_ENY/AtIDD1    | QNLQLHRRGH | NLPWKL  | RQRS...TKEV                              |
| Os03g0197800_OsIDD1     | QNLQLHRRGH | NLPWKL  | RQRS...GKEV                              |
| Os01g0195000_OsIDD2     | QNLQLHRRGH | NLPWKL  | KQRN...PKEV                              |
| Os09g0555700_OsIDD3     | QNLQLHRRGH | NLPWKL  | KQRN...PKEA                              |
| Os02g0672100_OsIDD4     | QNLQLHRRGH | NLPWKL  | KQRN...PLQA                              |
| Os07g0581366_OsIDD5     | QNLQLHRRGH | NLPWKL  | RQRGP...GAAPP                            |
| Os08g0554400_OsIDD6     | QNLQLHRRGH | NLPWKL  | KQRN...PKET                              |
| Os02g0518500_OsIDD7     | QNLQLHRRGH | NLPWKL  | KQRS...S.TEAK                            |
| Os01g0242200_OsIDD8     | QNLQLHRRGH | NLPWKL  | RQRS...GKEP                              |
| Os01g0935000_OsIDD9     | QNLQLHRRGH | NLPWKL  | RQRGGAG.GGGG...GEP                       |
| Os04g0566400_OsIDD10    | QNLQLHRRGH | NLPWKL  | KQRN...PAQA                              |
| Os01g0572300_OsIDD11    | QNLQLHRRGH | NLPWKL  | KQRG...SKEAV                             |
| Os08g0467100_OsIDD12    | QNLQMHRRRH | KVPWKL  | LKREAG...EAA                             |
| Os09g0449400_OsIDD13    | QNLQMHRRRH | KVPWKL  | LKREAG...EAA                             |
| Os03g0237250_OsIDD14    | QNLQMHRRRH | KVPWKL  | RKPAAATAAEDGGAAGGGGGAGGGGAGGGGAA         |
| Os01g0888700_OsIDDa     | IFEVATED   | GTVLAMK | LHRLG...RTSFR...AVKSKRDYL                |
| Os01g0871200_OsIDDb     | ANLRMHMRGH | GDEYKT  | PAALAKP...SKD...SSLESAPVTR...YSCPIVGCCK  |
| Os03g0838800_OsIDDb     | ANLRMHMRGH | GDEYKSA | ALAKPPGG...SPSRSPAADAARRRFFYS            |
| Os04g0165200_ART2       | ANLRMHMRGH | GDEYKTA | ALAL...STGAGMRAAARRRCSY                  |
| Os07g0162300_OsIDDe     | VYHATKADG  | QELAIKV | YKTS...VLVFKDRDRYVHGDYRFR                |
| Os10g0419200_Ehd2       | QNLQLHRRGH | NLPWKL  | RRAAAVS                                  |
| Os08g0562300_OsIDDf     | ANLRMHMRGH | GDEYKSA | ALSNPTK...LLAKGGDETMAAAARKYS             |
| Os02g0572900_STOP1      | ANLRMHMRGH | DRFKT   | LDALS                                    |
| Os12g0170400_DART1      | ANLRMHMRGH | GDEYKSA | ALAKPPP...PPEG.EEQPPQPE                  |

Figure S1. Multiple alignment of *IDD*-like transcription factors in Arabidopsis, Tomato and Rice. highly conserved amino acids are indicated in red characters and boxes.

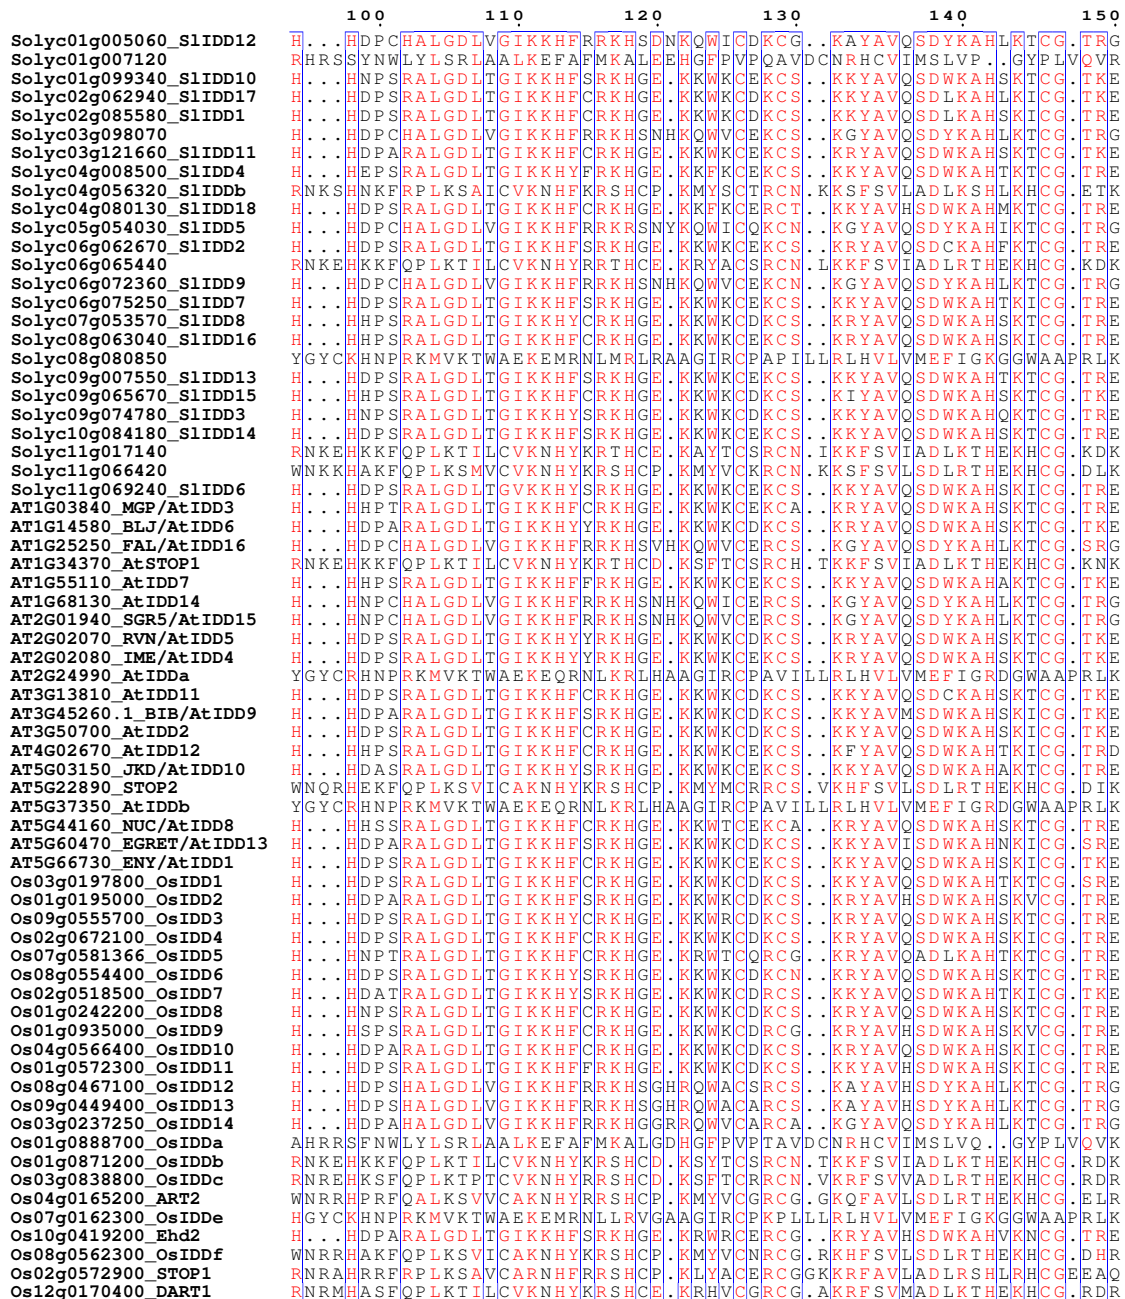

Figure S1. Multiple alignment of *IDD*-like transcription factors in Arabidopsis, Tomato and Rice. highly conserved amino acids are indicated in red characters and boxes.

|                         | 160   | 170       |                |
|-------------------------|-------|-----------|----------------|
| Solyc01g005060_S1IDD12  | HS    | CDCGRVFS  | RVESFIEHQDSC   |
| Solyc01g007120          | ELQNP | ...D      | VFETIIEAVIRL   |
| Solyc01g099340_S1IDD10  | YK    | CDCGTFFS  | RRDSFVTHRAFC   |
| Solyc02g062940_S1IDD17  | YK    | CDCGTFFS  | RRDSFITHRAFC   |
| Solyc02g085580_S1IDD1   | YK    | CDCGTFFS  | RRDSFITHRAFC   |
| Solyc03g098070          | HS    | CDCGRVFS  | RVESFIEHQDAC   |
| Solyc03g121660_S1IDD11  | YR    | CDCGTFFS  | RRDSFITHRAFC   |
| Solyc04g008500_S1IDD4   | YR    | CDCGTFFS  | RRDSFITHRAFC   |
| Solyc04g056320_S1IDDb   | WK    | CSCGTFFS  | RKDKLFGHMALEF  |
| Solyc04g080130_S1IDD18  | YR    | CDCGTFFS  | RRDSFITHRAFC   |
| Solyc05g054030_S1IDD5   | HS    | CDCGRVFS  | RVETFIEHQDSC   |
| Solyc06g062670_S1IDD2   | YK    | CECGTFFS  | RRDSFITHRAFC   |
| Solyc06g065440          | WL    | CSCGTFFS  | RKDKLFGHISLFF  |
| Solyc06g072360_S1IDD9   | HS    | CDCGRVFS  | RVESFIEHQDAC   |
| Solyc06g075250_S1IDD7   | YK    | CDCGTFFS  | RRDSFITHRAFC   |
| Solyc07g053570_S1IDD8   | YR    | CDCGTFFS  | RRDSFVTHRAFC   |
| Solyc08g063040_S1IDD16  | YR    | CDCGTFFS  | RRDSFITHRAFC   |
| Solyc08g080850          | DAALS | SDKLR     | ECYVEIIMAMRTLY |
| Solyc09g007550_S1IDD13  | YK    | CDCGTFFS  | RRDSFITHRAFC   |
| Solyc09g065670_S1IDD15  | YR    | CDCGTFFA  | RRDSFVTHRAFC   |
| Solyc09g074780_S1IDD3   | YK    | CDCGTFFS  | RRDSFITHRAFC   |
| Solyc10g084180_S1IDD14  | YK    | CDCGTFFS  | RRDSFITHRAFC   |
| Solyc11g017140          | WL    | CSCGTFFS  | RKDKLFGHISLFF  |
| Solyc11g066420          | WQ    | CSCGTFFS  | RKDKLMGHVSLFF  |
| Solyc11g069240_S1IDD6   | YK    | CDCGTFFS  | RRDSFITHRAFC   |
| AT1G03840_MGP/AtIDD3    | YR    | CDCGTFFS  | RRDSFITHRAFC   |
| AT1G14580_BLJ/AtIDD6    | YR    | CDCGTFFS  | RRDSYITHRAFC   |
| AT1G25250_FAL/AtIDD16   | HS    | CDCGRVFS  | RVESFIEHQDTC   |
| AT1G34370_AtSTOP1       | WL    | CSCGTFFS  | RKDKLFGHISLFF  |
| AT1G55110_AtIDD7        | YK    | CDCGTFFS  | RRDSFITHRAFC   |
| AT1G68130_AtIDD14       | HS    | CDCGRVFS  | RVESFIEHQDTC   |
| AT2G01940_SGR5/AtIDD15  | HS    | CDCG.FFS  | RVESFIEHQDNC   |
| AT2G02070_RVN/AtIDD5    | YR    | CDCGTFFS  | RRDSFITHRAFC   |
| AT2G02080_IME/AtIDD4    | YR    | CDCGTFFS  | RRDSYITHRAFC   |
| AT2G24990_AtIDDa        | DAALS | LDKLR     | ECYLELIIMRVLY  |
| AT3G13810_AtIDD11       | YR    | CDCGTFFS  | RRDSFITHRAFC   |
| AT3G45260.1_BIB/AtIDD9  | YR    | CDCGTFFS  | RRDSFITHRAFC   |
| AT3G50700_AtIDD2        | YK    | CDCGTFFS  | RRDSFITHRAFC   |
| AT4G02670_AtIDD12       | YR    | CDCGTFFS  | RKDFITHRAFC    |
| AT5G03150_JKD/AtIDD10   | YK    | CDCGTFFS  | RRDSFITHRAFC   |
| AT5G22890_STOP2         | WV    | CSCGTFFS  | RKDKLMSHVSLFF  |
| AT5G37350_AtIDDb        | DAALS | LDKLR     | ECYLELIIMRVLY  |
| AT5G44160_NUC/AtIDD8    | YR    | CDCGTFFS  | RRDSFITHRAFC   |
| AT5G60470_EGRET/AtIDD13 | FR    | CDCGTFFS  | RRDSFISHRSFC   |
| AT5G66730_ENY/AtIDD1    | YK    | CDCGTFFS  | RRDSFITHRAFC   |
| Os03g0197800_OsIDD1     | YR    | CDCGTFFS  | RRDSFITHRAFC   |
| Os01g0195000_OsIDD2     | YR    | CDCGTFFS  | RRDSFITHRAFC   |
| Os09g0555700_OsIDD3     | YR    | CDCGTFFS  | RRDSFITHRAFC   |
| Os02g0672100_OsIDD4     | YR    | CDCGTFFS  | RRDSFITHRAFC   |
| Os07g0581366_OsIDD5     | YR    | CDCGTFFT  | RRDSFVTHRAFC   |
| Os08g0554400_OsIDD6     | YR    | CDCGTFFS  | RRDSFITHRAFC   |
| Os02g0518500_OsIDD7     | YR    | CDCGTFFS  | RRDSFITHRAFC   |
| Os01g0242200_OsIDD8     | YR    | CDCGTFFS  | RRDSFITHRAFC   |
| Os01g0935000_OsIDD9     | YK    | CDCGTFVFS | RRDSFVTHRAFC   |
| Os04g0566400_OsIDD10    | YR    | CDCGTFFS  | RRDSFITHRAFC   |
| Os01g0572300_OsIDD11    | YK    | CDCGTFFS  | RRDSFITHRAFC   |
| Os08g0467100_OsIDD12    | HT    | CDCGRVFS  | RVESFIEHQDAC   |
| Os09g0449400_OsIDD13    | HS    | CDCGRVFS  | RVESFIEHQDTC   |
| Os03g0237250_OsIDD14    | HS    | CDCGRVFS  | RVESFIEHQDAC   |
| Os01g0888700_OsIDDa     | ELQNP | ...D      | VFDLILGLVIRL   |
| Os01g0871200_OsIDDb     | WL    | CSCGTFFS  | RKDKLFGHVALFF  |
| Os03g0838800_OsIDDb     | WV    | CSCGTFFS  | RKDKLFGHVALFF  |
| Os04g0165200_ART2       | WL    | CSCGTFFS  | RKDKLMGHVALFF  |
| Os07g0162300_OsIDDe     | DAALS | DDKLR     | RESYFELITMTRTY |
| Os10g0419200_Ehd2       | YR    | CDCGTFFS  | RRDSLITHRAFC   |
| Os08g0562300_OsIDDF     | WL    | CSCGTFFS  | RKDKLIGHVSLFF  |
| Os02g0572900_STOP1      | WR    | CSCGTFFS  | RKDKLFGHVALFF  |
| Os12g0170400_DART1      | WL    | CSCGTFFS  | RKDKLFGHVALFF  |

Figure S1. Multiple alignment of *IDD*-like transcription factors in Arabidopsis, Tomato and Rice. highly conserved amino acids are indicated in red characters and boxes.



180                      190

```

Solyc01g005060_S1IDD12 .....PRLQPITAACSS.....SDTNLP.....
Solyc01g007120 .....KVTIIDFPQMVSVSHPNQMYFDRDVECIY.....
Solyc01g099340_S1IDD10 .....TTQPLATG..PELIST.TQMLNLPQIR.....
Solyc02g062940_S1IDD17 .....AEEDLKVQVDVSSSTPQTPRTPPPSSEP.PAVPSPAAP.....
Solyc02g085580_S1IDD1 .....NEEPKTOAVASSSPSPSPAPPPATESQPPPPPAAP.....
Solyc03g098070 .....LRSESQSLHP...PCLSRSTASFPSSSDNLSTTPWS.....
Solyc03g121660_S1IDD11 .....ANPILPQAGS.....STSQMNFO.....
Solyc04g008500_S1IDD4 .....LMN...TLGMNNNQYLYGSSSNINLGTFFSKLGNNNNIT.....
Solyc04g056320_S1IDDb .....PAIENEKDVGVINGGSGNGLMDIRTGSDNGFLD.....
Solyc04g080130_S1IDD18 .....NAEG.DLKVDEAINKTVSSS.....SSPPP.....
Solyc05g054030_S1IDD5 .....KECHDMQIPKPIFLPTTTTTHIPPHDQYSKILP.....
Solyc06g062670_S1IDD2 .....RNPTIFSPQMN.....LQFQQPHY.....
Solyc06g065440 .....TSN.QGQP..MMQLQRLEI.....
Solyc06g072360_S1IDD9 .....LRSESQSLIQLPSAPCLSRSTASS.PSPSSDHTNNLITTT.....
Solyc06g075250_S1IDD7 .....STANLNFRN.EILLNGGFNTNLQQSTGNPQF.....
Solyc07g053570_S1IDD8 .....NPLAMANN...INYHFIGAPLGPNMAQHFSS.....
Solyc08g063040_S1IDD16 .....PPNSS.....
Solyc08g080850 .....HLYVIDVSQSVLDLHPLALDFLREDCVHVS.....
Solyc09g007550_S1IDD13 .....TTNNLNFN...QQQQQ.PVGVSQIG.....
Solyc09g065670_S1IDD5 .....LMHRAATSTIANSA.....
Solyc09g074780_S1IDD3 .....MEHNMHSGQMHEIMSS.NASLGLSEFN.....
Solyc10g084180_S1IDD14 .....ATNLINFPNTATLLNQO.QANLHGFG.....
Solyc11g017140 .....TSD.RGQTEVTMKARQENYKVN.ASLGNEFQNP.....
Solyc11g066420 .....KQSAR.....
Solyc11g069240_S1IDD6 .....TAVNLNLR.NQLINGGIS.TNLQQOQ..QM.....
AT1G03840_MGP/AtIDD3 .....SFAATAGS...NLNYHYLMGTLPSPSLPQPP.....
AT1G14580_BLJ/AtIDD6 .....MAAGGGGGARHGFGY..GASS..ALS.HNHFGNNPNSG.....
AT1G25250_FAL/AtIDD16 .....TNHR..HLQHTMGLDAPSRTTS...TASFG.....
AT1G34370_AtSTOP1 .....TSTQRGSSEGGNNNQMGVFNLSGASNANOETTQ.....
AT1G55110_AtIDD7 .....AMPNP.....IMIQASNS.....
AT1G68130_AtIDD14 .....SNHRLHEQQHTTNAQTASTAENNENGDLISG.....
AT2G01940_SGR5/AtIDD15 .....EPPRRPQTAVTVPACSSRTASTVSTPSSETNYGGTVAVIT.....
AT2G02070_RVN/AtIDD5 .....LPSHHFPYGGQNTNNSNNNASS.MILG.LSHMGAPQNLD.....
AT2G02080_IME/AtIDD4 .....MTAASSGVGSGGIYGRLLGGGS..ALS.HHLLSDHPNFG.....
AT2G24990_AtIDDa .....HLYIIDVSQSVLDLHPLALNFLREDCDHVS.....
AT3G13810_AtIDD11 .....QNQNNQPNP.....LLIHQSAS.....
AT3G45260.1_BIB/AtIDD9 .....APAYLNNALDVEVNHGNINQNHQORQL.....
AT3G50700_AtIDD2 .....NPE.....ILTRKNP.....VPN.....
AT4G02670_AtIDD12 .....SSNLTNPN.....
AT5G03150_UKD/AtIDD10 .....I...STTNLNFNGNESVMNPNLPHGFVHRG.....
AT5G22890_STOP2 .....GSSKPPITLK.....
AT5G37350_AtIDDb .....HLYIIDVSQSVLDLHPLALNFLREDCDHVS.....
AT5G44160_NUC/AtIDD8 .....GLAAAGAPGSVNLNYQYLMGTFIP...PLQP.....
AT5G60470_EGRET/AtIDD13 .....PLAANSTIATVDTNPNILIQSQLDQS.....
AT5G66730_ENY/AtIDD1 .....YPE.....TVTRKNPEIEQKSPAAVESSPSLPPSSPPSV.....
Os03g0197800_OsIDD1 .....ADEDGTSASAGAPPPQAPLPPPAPVPAPAPPPPP.....
Os01g0195000_OsIDD2 .....AAAAVAGQQQHGG...GMLFSQVAD.....
Os09g0555700_OsIDD3 .....VYGGAGN..MTLG.LTGMAAPQLPAGFPDQAGQ.....
Os02g0672100_OsIDD4 .....HLYGSAGAANMALS..LSQVGSHLASTLQDHGHHHHHG.....
Os07g0581366_OsIDD5 EEEVKEKEKEKELEENEDSPVAEVDPEQPQSAVAEVPQQCAPSPPPPPPIQLQEHPPQPVVA
Os08g0554400_OsIDD6 .....LYAAAGAG.MAIGGLTGMAASHQLQPFQDHSAS.....
Os02g0518500_OsIDD7 .....SLHGQQDMFSGHGVPSFSSSPDMIANLASN.....
Os01g0242200_OsIDD8 .....AAAAAATATSLCGQSYLAFAGSGGPMGAMRPN.....
Os01g0935000_OsIDD9 .....AVTSALQGO...QQAHPVADDDDAAGVKSPH.....
Os04g0566400_OsIDD10 .....SHLYGASNAGNMALS..LSQVGSHLTTSLQDGGGHHHHP.....
Os01g0572300_OsIDD11 .....PAAMAAPGHHHHHHHHHHHQLFSPPV.....
Os08g0467100_OsIDD12 .....VGAPAAAASSQQQLFAVPASLSRTASS.ASPSSDLVSPVAVPAT.....
Os09g0449400_OsIDD13 .....GGVAVLEQEKQLDLQAPAAAASLSRTASS.TSPSSDVVASPVAVP.....
Os03g0237250_OsIDD14 .....EVVPVATTLPVIRPALRHHHHHHPPPPPELQLLP.....
Os01g0888700_OsIDDa .....KVTMIDFPQMVSVKHRNAQMFFDRDIECIY.....
Os01g0871200_OsIDDb .....SEQPQGSE.AMNTMVGSAGYNFPSSSDDIPNLD.....
Os03g0838800_OsIDDb .....SGQLPHAAGEAVGRTVDTNRFFS...DGLMIK.....
Os04g0165200_ART2 .....EASPSTTTTGTGTTDRSRTGLID.....
Os07g0162300_OsIDDe .....HLYIIDVSQSVLDLHPSALEFLKEDCLHVT.....
Os10g0419200_Ehd2 .....SITTTTCNNSNINSSNNNNNNINSISNS.....
Os08g0562300_OsIDDF .....QRSSASVAGNIDDTTGIGMGAA.....
Os02g0572900_STOP1 .....ATAAAEASISMEEGG.VEANCNDREDEEGGFDP.....
Os12g0170400_DART1 .....RRRHKQEEPEFTWGGGGGNEFLDVKGIAGVGSGS.....

```

Figure S1. Multiple alignment of *IDD*-like transcription factors in Arabidopsis, Tomato and Rice. highly conserved amino acids are indicated in red characters and boxes.

Solyc01g005060\_S1IDD12 .....KLAIMPLPKNS.....TNLE  
 Solyc01g007120 .....KFFAKRYNMSFDENENDSDGLEVDINEVGR  
 Solyc01g099340\_S1IDD10 .....NSN.....MKIP...SIPLNMA  
 Solyc02g062940\_S1IDD17 .....EPLPPP GSP.STAVVSS.....DSPIQHP...ESPHTNSNGTITKHDIEE  
 Solyc02g085580\_S1IDD1 .....KSLMTP TVPPSTAVMSF.....ASSVQNRRELRENVPVINSAGAATKQVVEE  
 Solyc03g098070 .....STLLK.....KLSSAAAAANP...NMVKSCTNKHNL  
 Solyc03g121660\_S1IDD11 .....FQPFNH EIPVTFSLKKEQQTGFNLRPEI  
 Solyc04g008500\_S1IDD4 .....KTTTTTTTTTSG.VQFDHHHHDNNLIGSS...TT.TTTTTNNPF  
 Solyc04g056320\_S1IDDb .....RLMLDGFESIDSYCFQDLFESSSPNGLNTPVNTTGWV...  
 Solyc04g080130\_S1IDD18 .....QPLTPSTSVLSPVLSIQ.....SSELPEYQNGQGGVQIQQAQGTTPVST  
 Solyc05g054030\_S1IDD5 .....NLDLELFTSPN.....YFNQN  
 Solyc06g062670\_S1IDD2 .....FNSHEQIQ AATFPMKKEQQSSDFRHIEI  
 Solyc06g065440 .....  
 Solyc06g072360\_S1IDD9 .....NTIP.....WPNFIINTPN...AMIK...EHNLE  
 Solyc06g075250\_S1IDD7 .....GSNLF RPEFMGLG.LDPAISHHHQPQLNNDVGDQKPRI  
 Solyc07g053570\_S1IDD8 .....LFKPVSNNNN.....NNNNNENSDPMRR.....NQLSL  
 Solyc08g063040\_S1IDD16 .....TSHHLLNHTLQNF.....QMKQEQQQ  
 Solyc08g080850 .....DFFKKGVAVMTIRELDFDIVDPTINDSV  
 Solyc09g007550\_S1IDD13 .....TSFAQDFTSMTTVN..PLHQHQ.KPRL  
 Solyc09g065670\_S1IDD5 .....AIADEPNFHLDQSSVFPFPANQRHFANP  
 Solyc09g074780\_S1IDD3 .....NFDPKNSLKALPQELLPIPFKSMTNNMA  
 Solyc10g084180\_S1IDD14 .....AGCRP DFGSYTTGNNSLHQQQKPKRL  
 Solyc11g017140 .....GVVKECPYNPSSYF SPLNFDTSNLNGFQEPFRPPDES  
 Solyc11g066420 .....  
 Solyc11g069240\_S1IDD6 .....SGNIS..QLMGLGSLDPSN.....QLNLDHGQKSRL  
 AT1G03840\_MGP/AtIDD3 .....SFPFGPPQPQ.....HHHHHQFP ITTNNFDHQDVMKPASTLSL  
 AT1G14580\_BLJ/AtIDD6 .....FTPLAAAGYNLN.....RSSSDKFEDFVPPQA...TNPNGPT.NFL  
 AT1G25250\_FAL/AtIDD16 .....PLLHGLPLLR.PP.....RPSNQHS  
 AT1G34370\_AtSTOP1 .....PGMTDGRICFEESFSPMNFDTCNFGGFHEFPRLMFDDSESS  
 AT1G55110\_AtIDD7 .....PHHHHQ TQCNIGFSSSS.....QNIIS  
 AT1G68130\_AtIDD14 .....PILPGHPLQRRQS.....PPSEQQP  
 AT2G01940\_SGR5/AtIDD15 .....PQPLEGRPIHQRISSSILTNSSNNLLELQLLPLSSNQ.....PNQENQQ  
 AT2G02070\_RVN/AtIDD5 .....HQPGDVLRLGSGGGGGAASRSSDLIAAN...ASGYFMQENPS  
 AT2G02080\_IME/AtIDD4 .....FNPL..VGYNLN...IASSDNRDFIPOS...SNPN...FL  
 AT2G24990\_AtIDDa .....DFFKKGVAVMTIRELDFDIVDPAITDENV  
 AT3G13810\_AtIDD11 .....HPHHHQ TQPTINVSSSSSSSNNHNIN  
 AT3G45260.1\_BIB/AtIDD9 .....NTTSSQLDQPGFNTNRNIAFLG...QTL  
 AT3G50700\_AtIDD2 .....PVPAP.VD TESAKIKS.....SSTLTIK...QS...ESPKTPEI VQE  
 AT4G02670\_AtIDD12 .....PNFQGHFMFNKSSSLLFTSSP.LFIEP  
 AT5G03150\_UKD/AtIDD10 .....VHHPDINA AISQFGLGFGHDLFSAMHAQQ  
 AT5G22890\_STOP2 .....  
 AT5G37350\_AtIDDb .....DFFKKGVAVMTIRELDFDIVDPTISDENV  
 AT5G44160\_NUC/AtIDD8 .....FVPQPQTNP.....HHHQHFQPTS.....SSLSL  
 AT5G60470\_EGRET/AtIDD13 .....STGTADLN VNNNHTTLFGQKFTNSNPTQQ  
 AT5G66730\_ENY/AtIDD1 .....AIAPAP AISVETESVKIIS.....SSVLP IQ...NSPESQENNNHPEVIEE  
 Os03g0197800\_OsIDD1 .....AAAPAPAAQPEQRD.RD.....AALDQFATPAPAP...APPV TAPP  
 Os01g0195000\_OsIDD2 .....VLDHQAMAMGGHGLMQELCLKREQQQ  
 Os09g0555700\_OsIDD3 .....PSASAGDVLRLGGGSGNGASQFDHLMASS...SGSSMFRSQG..  
 Os02g0672100\_OsIDD4 .....ASPDLLRFGGSGGG.....AMAARLEHLLSSS...SASAFRPLPP  
 Os07g0581366\_OsIDD5 VVPNVDEQEVVAKPAVIAKIEVEDERDEEVCFQEVDRYKDAELEDNSLLDNDTPMLPCFL  
 Os08g0554400\_OsIDD6 .....IT TAA.....NAAAQFDHLMATSSAAAGSPAFAAAQPT  
 Os02g0518500\_OsIDD7 .....DHNSDSLRS...LSPYALVTRNTTLF  
 Os01g0242200\_OsIDD8 .....MMMPPPQDAA.....QLSWLYGN.....SNST  
 Os01g0935000\_OsIDD9 .....LKMFPD VDN I.....VAAATAGNPLLP  
 Os04g0566400\_OsIDD10 .....SPELLRLGGAGGGGGAGGSSIAARLDHLLSPS...GASAFRP.PQP  
 Os01g0572300\_OsIDD11 .....MAHHQELALQEQ...QQQHHDQVMQS  
 Os08g0467100\_OsIDD12 .....GGGGPAMVSPRAAAPAPAGGSI AAFHHRFTDPALSPPTPCGGRRGGCHTHSLE  
 Os09g0449400\_OsIDD13 .....GAGAPSMPSPKAAA.....FRGRF.DMAPSPPPP SYDHYRGGAGAHNLE  
 Os03g0237250\_OsIDD14 .....ASTTAPLAAAFS.....SNST  
 Os01g0888700\_OsIDDa .....KFFRKRFLHSSEKCE.EQDGSIDDDENSR  
 Os01g0871200\_OsIDDb .....MKMADD...PRYFSPLSFDPC.FGLDDFTTRPGFDISENP  
 Os03g0838800\_OsIDDC .....GSMED E...RGSLSPMGLDYCEFDGIDLFAAAAFDF...  
 Os04g0165200\_ART2 .....  
 Os07g0162300\_OsIDDe .....DFFKKGVAVMSVTELFNFVIDQNIAD EDV  
 Os10g0419200\_Ehd2 .....NNLLITSSSSSPPLFLPFSTTPAENPNP  
 Os08g0562300\_OsIDDF .....  
 Os02g0572900\_STOP1 .....KFFQEWMEELRG...GAVAPN.WSAPSEAGH...  
 Os12g0170400\_DART1 .....GGGDEFFS..AGSFGAMDFGFGQLDASLAMLPLPSEQFAG..

Figure S1. Multiple alignment of *IDD*-like transcription factors in Arabidopsis, Tomato and Rice. highly conserved amino acids are indicated in red characters and boxes.

```

Solyc01g005060_S1IDD12 LGLKSS.....
Solyc01g007120 PQFSEINKNKNSGFLLD.....
Solyc01g099340_S1IDD10 .GSMFSSSSG.....
Solyc02g062940_S1IDD17 TTAKSRLSGICSSSSCTGCTNSNCFTSLTGICSSSSWSSSSNGSTSNSSIFSSLTGICSSST
Solyc02g085580_S1IDD1 AAVVASLTGNCSSS.....
Solyc03g098070 LQLLTT.....
Solyc03g121660_S1IDD11 PPWLLVGGGGGPGP.....
Solyc04g008500_S1IDD4 FLQDTNQDHYN.....
Solyc04g056320_S1IDDb .....
Solyc04g080130_S1IDD18 TPVITISTAAASGP.....
Solyc05g054030_S1IDD5 THNFSS.....
Solyc06g062670_S1IDD2 PPWLITTN SQPFQL.....
Solyc06g065440 .....
Solyc06g072360_S1IDD9 LQLLTT.....
Solyc06g075250_S1IDD7 PLWLDN.NMNPNGND.....
Solyc07g053570_S1IDD8 WNNIGVAEQDQIGININNLRL.....
Solyc08g063040_S1IDD16 NNDLS.SQLFIQNP.....
Solyc08g080850 DSYLEKVQERILAR.....
Solyc09g007550_S1IDD13 SLWLNQANNMMS.....
Solyc09g065670_S1IDD15 PPPQLPISAAATGV.....
Solyc09g074780_S1IDD3 PGGMFSITSGNLFGNsprsv.....
Solyc10g084180_S1IDD14 SLWLDQQAANHNPN.....
Solyc11g017140 FSFLLSGSCFYPPHKAAKFMSSSEME.....
Solyc11g066420 .....
Solyc11g069240_S1IDD6 PLWLHHENSNYGNPND.....
AT1G03840_MGP/AtIDD3 WSGGNINHHQQVT.....
AT1G14580_BLJ/AtIDD6 MQCSPNQGLLAQ.....
AT1G25250_FAL/AtIDD16 PAFAYPF.....
AT1G34370_AtSTOP1 FQMLIANACGFSprNVGESVSDTSL.....
AT1G55110_AtIDD7 .....
AT1G68130_AtIDD14 STLLYPF.....
AT2G01940_SGR5/AtIDD15 QKVKEP.....
AT2G02070_RVN/AtIDD5 FHDQQDHHHHHQQGF.....
AT2G02080_IME/AtIDD4 IQSASSQGMLNTT.....
AT2G24990_AtIDDa DSYLEEVQRKVIER.....
AT3G13810_AtIDD11 SLHFDTNNGNTNNS.....
AT3G45260.1_BIB/AtIDD9 PTNVFASSSSPSPR.....
AT3G50700_AtIDD2 APKPTS LN.VVTS.....
AT4G02670_AtIDD12 . . .SLSTAALSTPP.....
AT5G03150_JKD/AtIDD10 LSEMVMQMASTGNHH.....
AT5G22890_STOP2 .....
AT5G37350_AtIDDb DSYLEEVQRKVIER.....
AT5G44160_NUC/AtIDD8 WMG.....
AT5G60470_EGRET/AtIDD13 QPNALALSSPPSPR.....
AT5G66730_ENY/AtIDD1 ASRTIGFN.VSSSD.....
Os03g0197800_OsIDD1 PPPVAAPND CVSSS.....
Os01g0195000_OsIDD2 QQQFAPSWLTAQQQ.....
Os09g0555700_OsIDD3 .SSSSSFYLANGAAHHAPAQD.....
Os02g0672100_OsIDD4 QQQPPAPFLLGAAP.....
Os07g0581366_OsIDD5 PSPSEAIGTDGSSST.....
Os08g0554400_OsIDD6 SSSSSPFYLG.....
Os02g0518500_OsIDD7 SNQISPKESG.....
Os01g0242200_OsIDD8 .....
Os01g0935000_OsIDD9 .....
Os04g0566400_OsIDD10 AFFLNAAAAAAATG.....
Os01g0572300_OsIDD11 PHQHQQQQQQRQQL.....
Os08g0467100_OsIDD12 LQLMPPRTTTTCAG.....
Os09g0449400_OsIDD13 LQLMPP.....FNA.....
Os03g0237250_OsIDD14 TTGSSS.....
Os01g0888700_OsIDDa PSFLSIQKAAGSLD.....
Os01g0871200_OsIDDb FSFLPSGSCSFGQQNGDS.....
Os03g0838800_OsIDDb .....
Os04g0165200_ART2 .....
Os07g0162300_OsIDDe DHYLEKIQQKMLEN.....
Os10g0419200_Ehd2 NQLLFLQQHQAAH.....
Os08g0562300_OsIDDF .....
Os02g0572900_STOP1 .....
Os12g0170400_DART1 .....DHQEENGDK.....

```

Figure S1. Multiple alignment of *IDD*-like transcription factors in Arabidopsis, Tomato and Rice. highly conserved amino acids are indicated in red characters and boxes.

```

Solyc01g005060_SlIDD12 .....
Solyc01g007120 .....
Solyc01g099340_SlIDD10 .....
Solyc02g062940_SlIDD17 R S S S S N G S T G S I S V F P S L S G I C S N S R S S S S N G S T Q S S S I F S S S T G I C S S S I F P S S T G I C S
Solyc02g085580_SlIDD1 ..... C S N G .....
Solyc03g098070 .....
Solyc03g121660_SlIDD11 .....
Solyc04g008500_SlIDD4 .....
Solyc04g056320_SlIDDb .....
Solyc04g080130_SlIDD18 .....
Solyc05g054030_SlIDD5 .....
Solyc06g062670_SlIDD2 .....
Solyc06g065440 .....
Solyc06g072360_SlIDD9 .....
Solyc06g075250_SlIDD7 .....
Solyc07g053570_SlIDD8 .....
Solyc08g063040_SlIDD16 .....
Solyc08g080850 .....
Solyc09g007550_SlIDD13 .....
Solyc09g065670_SlIDD15 .....
Solyc09g074780_SlIDD3 .....
Solyc10g084180_SlIDD14 .....
Solyc11g017140 .....
Solyc11g066420 .....
Solyc11g069240_SlIDD6 .....
AT1G03840_MGP/AtIDD3 .....
AT1G14580_BLJ/AtIDD6 .....
AT1G25250_FAL/AtIDD16 .....
AT1G34370_AtSTOP1 .....
AT1G55110_AtIDD7 .....
AT1G68130_AtIDD14 .....
AT2G01940_SGR5/AtIDD15 .....
AT2G02070_RVN/AtIDD5 .....
AT2G02080_IME/AtIDD4 .....
AT2G24990_AtIDDa .....
AT3G13810_AtIDD11 .....
AT3G45260.1_BIB/AtIDD9 .....
AT3G50700_AtIDD2 .....
AT4G02670_AtIDD12 .....
AT5G03150_JKD/AtIDD10 .....
AT5G22890_STOP2 .....
AT5G37350_AtIDDb .....
AT5G44160_NUC/AtIDD8 .....
AT5G60470_EGRET/AtIDD13 .....
AT5G66730_ENY/AtIDD1 ..... L S N D .....
Os03g0197800_OsIDD1 ..... S S G .....
Os01g0195000_OsIDD2 .....
Os09g0555700_OsIDD3 .....
Os02g0672100_OsIDD4 .....
Os07g0581366_OsIDD5 ..... S C G .....
Os08g0554400_OsIDD6 .....
Os02g0518500_OsIDD7 .....
Os01g0242200_OsIDD8 .....
Os01g0935000_OsIDD9 .....
Os04g0566400_OsIDD10 .....
Os01g0572300_OsIDD11 .....
Os08g0467100_OsIDD12 .....
Os09g0449400_OsIDD13 .....
Os03g0237250_OsIDD14 .....
Os01g0888700_OsIDDa .....
Os01g0871200_OsIDDb .....
Os03g0838800_OsIDDb .....
Os04g0165200_ART2 .....
Os07g0162300_OsIDDe .....
Os10g0419200_Ehd2 .....
Os08g0562300_OsIDDe .....
Os02g0572900_STOP1 .....
Os12g0170400_DART1 .....

```

Figure S1. Multiple alignment of *IDD*-like transcription factors in Arabidopsis, Tomato and Rice. highly conserved amino acids are indicated in red characters and boxes.

```

Solyc01g005060_SlIDD12 .....SHHEN.TI
Solyc01g007120 .....KELAASGFTRKDQ
Solyc01g099340_SlIDD10 .....FNQLGTNNSN.
Solyc02g062940_SlIDD17 GSSIFASSTGIYSNSSLSSNRSTSGSSIIFSLTGTICSSSSNSSSNSTFASLFFASSTASG
Solyc02g085580_SlIDD1 .....SSSNVFGSLFFASSTASG
Solyc03g098070 .....TTSSSSP...AFDVSVSSKPNE
Solyc03g121660_SlIDD11 .....G...PGPPQ.PQPID
Solyc04g008500_SlIDD4 .....ANNNNIKPLMVHGLMQLPNLDH
Solyc04g056320_SlIDDb .....
Solyc04g080130_SlIDD18 .....SSSKVFASVFPSSSSAQ
Solyc05g054030_SlIDD5 .....FVDQSDHHH
Solyc06g062670_SlIDD2 .....GAINPSPSV.PLSNF
Solyc06g065440 .....
Solyc06g072360_SlIDD9 .....TSTTTTSPCSPFDVSISSKSRD
Solyc06g075250_SlIDD7 .....FLVASSSSTTSNLPHHELVIQI
Solyc07g053570_SlIDD8 .....EIHQINPLLHHTSAPAP.APVYDANTLLASSRSN
Solyc08g063040_SlIDD16 .....NGNSSNMFGAP.PPH
Solyc08g080850 .....GDMTA.EEEIADS
Solyc09g007550_SlIDD13 .....SQSSNLFGLPDH...H
Solyc09g065670_SlIDD15 .....TTHISLNPWEPQ
Solyc09g074780_SlIDD3 .....ASSSSGLQLSSNIPSNFNYLQDQNGKNR
Solyc10g084180_SlIDD14 .....LQISSSSNLFDSSTGGFQE
Solyc11g017140 .....
Solyc11g066420 .....
Solyc11g069240_SlIDD6 .....FLSTP.STTTSTLP.HELVQV
AT1G03840_MGP/AtIDD3 .....IEDRMAPQPHSPQEDYNWVFGNANNH
AT1G14580_BLJ/AtIDD6 .....NNQSLMNHGHLISLG...DN
AT1G25250_FAL/AtIDD16 .....NAS.SAPP
AT1G34370_AtSTOP1 .....
AT1G55110_AtIDD7 .....NSNLHG.PMKQE
AT1G68130_AtIDD14 .....VTNGSIEL
AT2G01940_SGR5/AtIDD15 .....SHHHNNH
AT2G02070_RVN/AtIDD5 .....LAGNNNIKQSPMSFQQNLMQFSH
AT2G02080_IME/AtIDD4 .....PNNNNQSPMNQHGLIQFDPVDN
AT2G24990_AtIDDa .....GEISV.EDEIADS
AT3G13810_AtIDD11 .....NNSNNHLHFTFPMKQE
AT3G45260.1_BIB/AtIDD9 .....SASDSLQNLWHLQOQ.SSHQ
AT3G50700_AtIDD2 .....NGVFAGLFESSASP
AT4G02670_AtIDD12 .....TAALSAT...
AT5G03150_JKD/AtIDD10 .....LFPSSSSSLPDFS GHHQFQI
AT5G22890_STOP2 .....
AT5G37350_AtIDDb .....GEISV.EDEIADS
AT5G44160_NUC/AtIDD8 .....QDIAPPQ...PQPDYDWFVGNAKAA
AT5G60470_EGRET/AtIDD13 .....STSDSVHNLWKLQEECAHQ
AT5G66730_ENY/AtIDD1 .....HSNNNGGYAGL FVSSSTASP
Os03g0197800_OsIDD1 .....VAPTSQSLSSSMFAPPSVAQ
Os01g0195000_OsIDD2 .....QQQLEAMAGAGNPAA
Os09g0555700_OsIDD3 .....FGPEDGQSQAGQGSLLHGKPAAFHDLMLQLPVQHQ
Os02g0672100_OsIDD4 .....QGFGDGGDGS GPHGLQKPA.FHGLMQLPDLQ
Os07g0581366_OsIDD5 .....TGSSVTNAIAPATTTSTFAG
Os08g0554400_OsIDD6 .....GGDDGQAHT...SLLHGKPA.FHGLMQLPQEQG
Os02g0518500_OsIDD7 .....FPLDGSVTSYP
Os01g0242200_OsIDD8 .....GKLSSSNASE
Os01g0935000_OsIDD9 .....PLSMAGCMLS LAAP
Os04g0566400_OsIDD10 .....QDFGDD.AGNGQHSFLQAKP.FHGLMQLPDLQ
Os01g0572300_OsIDD11 .....VQNCGYAVKPEMAP
Os08g0467100_OsIDD12 .....GSLGGTPVATAVGY YASSSPHS
Os09g0449400_OsIDD13 .....GGAAAAPGGMGACFYAAAHQHH
Os03g0237250_OsIDD14 .....HEQHATTM
Os01g0888700_OsIDDa .....KELAASGFTRKEQ
Os01g0871200_OsIDDb .....
Os03g0838800_OsIDDC .....
Os04g0165200_ART2 .....
Os07g0162300_OsIDDe .....GDMVANDEITPT
Os10g0419200_Ehd2 .....HQLLLPQFQQP
Os08g0562300_OsIDDF .....
Os02g0572900_STOP1 .....
Os12g0170400_DART1 .....

```

Figure S1. Multiple alignment of *IDD*-like transcription factors in Arabidopsis, Tomato and Rice. highly conserved amino acids are indicated in red characters and boxes.

Solyc01g005060\_SlIDD12 EE.....AHLKLSIGS.....  
 Solyc01g007120 DELEK.....  
 Solyc01g099340\_SlIDD10 .....MS.....SATALLQQAQMGA.....  
 Solyc02g062940\_SlIDD17 SLPSQAPQFTDW.....FQSVAPSPPPDIEPPSSMEPI SLCLAMN.....  
 Solyc02g085580\_SlIDD1 SLPSQAPVFSDI.....FRAMAPEHTLEMAPPSSSTEPISLGLAMS.....  
 Solyc03g098070 DH.....SAHNLQLSIGS.....  
 Solyc03g121660\_SlIDD11 LSSS.....IFQSSRFSDQDYTQS.HQHHQ.....  
 Solyc04g008500\_SlIDD4 NNNNSS.....SSTTMFNLNFFQNN.....LS  
 Solyc04g056320\_SlIDDb HVNSSYS.....DILRAIETEQVMAVEPI SLSLSSSLYLSN.....  
 Solyc04g080130\_SlIDD18 HN.....NNYIVQND.....  
 Solyc05g054030\_SlIDD5 SSSS.....IFPATRLDQQYSQSSHKDLN.....  
 Solyc06g062670\_SlIDD2 .....  
 Solyc06g065440 .....  
 Solyc06g072360\_SlIDD9 D.....HNLQLSIGS.....  
 Solyc06g075250\_SlIDD7 AAHN.....NTQQWFINGTGVGDDSGIGSSSSQLPS.....  
 Solyc07g053570\_SlIDD8 APPVSYNN.....NNHNWDQFIGSKTSPINN.....  
 Solyc08g063040\_SlIDD16 MSAT.....ALLQKAAQIGVTSSSHTANNMS.....  
 Solyc08g080850 VFIQS.....  
 Solyc09g007550\_SlIDD13 MVQIP.....SHNMFQTNQILNPTPTTTT.....  
 Solyc09g065670\_SlIDD15 IPLNP.....NHTHEENHHQITHPVPIKTE.....  
 Solyc09g074780\_SlIDD3 VAQQG.....GQLSSVPMASATALLQKAAQMGA.....  
 Solyc10g084180\_SlIDD14 MIQMQ.....SQNVFGSSNSTSANFSIAEA.....  
 Solyc11g017140 .....  
 Solyc11g066420 .....  
 Solyc11g069240\_SlIDD6 APHANMLGSSSLHKNNNNNNNNQWVFNDD..GGDAIITSSSMLMP.....  
 AT1G03840\_MGP/AtIDD3 GELIT.TS.....DSLITHDNNINIVQSKEN.....  
 AT1G14580\_BLJ/AtIDD6 NNN.....NHNFFNLAYFQDTK.....  
 AT1G25250\_FAL/AtIDD16 ES.....LELQLSIGM.....  
 AT1G34370\_AtSTOP1 .....  
 AT1G55110\_AtIDD7 ES.....QHYYQNI PPWLISSNPNPNGN.....  
 AT1G68130\_AtIDD14 QL.....LPSRNCAD.....  
 AT2G01940\_SGR5/AtIDD15 DT.....TNLNLISIAP.....  
 AT2G02070\_RVN/AtIDD5 DNHNSA.....PSN.VFNLSFLSGNNGVTATSNPNAAAAAAASV  
 AT2G02080\_IME/AtIDD4 INLKSSG.....TNSFFNLGFFQENT.....  
 AT2G24990\_AtIDDa VFMKS.....  
 AT3G13810\_AtIDD11 QQSND.....HIMNYHHSI PPWLAPQPHALTESM.....  
 AT3G45260.1\_BIB/AtIDD9 WLLNE.....NNNNNNLQRGISKNQEEHEM.....  
 AT3G50700\_AtIDD2 SIYTTT.....SSSKSLFASSSSIEPI SLGLST.....  
 AT4G02670\_AtIDD12 .....  
 AT5G03150\_JKD/AtIDD10 PMTST.....NPSLTLSSSSTSQOTSASLQ.....  
 AT5G22890\_STOP2 .....  
 AT5G37350\_AtIDDb VFMKS.....  
 AT5G44160\_NUC/AtIDD8 SACID.NN.....N..THDEQITQ.NANAS.....  
 AT5G60470\_EGRET/AtIDD13 WLLNE.....YMNNKNIFHKGIFKNQEDEIK.....  
 AT5G66730\_ENY/AtIDD1 SLYASS.....TASPSLFAPSSSMEPI SLCLSTNPSL.....  
 Os03g0197800\_OsIDD1 APQYADP.....IGVAGGQHQRAPVAKPPALCLAPN.....  
 Os01g0195000\_OsIDD2 MYGS.....ARLDQEEFIGSSTPESGGAQQAG.....  
 Os09g0555700\_OsIDD3 QSGNGN.....LLNLGFFS..GSNGG.....  
 Os02g0672100\_OsIDD4 NGTGGPSP.....SGPGLYNLGYIANSANSSGSSSHGHASQGMNTN  
 Os07g0581366\_OsIDD5 LFAVTT.....SSTPQRSRLRDLIGVDPFTFLCLAIG.....  
 Os08g0554400\_OsIDD6 SNGGG.....LLNLSEYS..GGNGHHHHHHE..GRLVF  
 Os02g0518500\_OsIDD7 YMS.....MNSPYMSATALLQKAAEMGA.....  
 Os01g0242200\_OsIDD8 LTS.....ATAA.....  
 Os01g0935000\_OsIDD9 LSSPF.....LPGCKLG.....  
 Os04g0566400\_OsIDD10 NGAGGPGA.....PGPNLNLGFFANNGNSSG.SSHEHASQGLMSN  
 Os01g0572300\_OsIDD11 WPTT.....MPYDHHHPLLQPLCNANAAATA.....  
 Os08g0467100\_OsIDD12 PAAALPSRQ.....PVADAMRLQLSIGFGGA.....  
 Os09g0449400\_OsIDD13 PTGVSQCN.....DASTQLQLSIGR.....  
 Os03g0237250\_OsIDD14 TT.....TKLQLSIGP.....  
 Os01g0888700\_OsIDDa VEMDK.....  
 Os01g0871200\_OsIDDb .....  
 Os03g0838800\_OsIDDb .....  
 Os04g0165200\_ART2 .....  
 Os07g0162300\_OsIDDe VLVQTL.....  
 Os10g0419200\_Ehd2 PSSPP.....AYFDHLAFGGGGGVITG.....  
 Os08g0562300\_OsIDDF .....  
 Os02g0572900\_STOP1 .....  
 Os12g0170400\_DART1 .....

Solyc01g005060\_S1IDD12 ..... SS ..... PNHEVLNL.....  
Solyc01g007120 ..... LIEGELENHSDSDDEGTADDEE.....  
Solyc01g099340\_S1IDD10 ..... TVNNNMNSTLFG.....  
Solyc02g062940\_S1IDD17 ..... HGSSVFGSTG.....QERMQYAAAP.....  
Solyc02g085580\_S1IDD1 ..... HSSSIFRPAG.....QERRQYAPAP.....  
Solyc03g098070 ..... SDFNESSENANEKRSSDALRLKDEATEQLRV.....  
Solyc03g121660\_S1IDD11 ..... QGFMNPNPSLSGPT.....SGA.....  
Solyc04g008500\_S1IDD4 TNSGILGDHHHHHRHDNN.....SNISCSIPSLYG...VQVLESSNTTFSSG...  
Solyc04g056320\_S1IDDb ..... NRASLFOEHTGGHGHGHGHQHYGSATM.....  
Solyc04g080130\_S1IDD18 ..... IEVKEIIEEATQVTRLKSEANEILKI.....  
Solyc05g054030\_S1IDD5 ..... LHHQNPNPNLRGPTLGYDSMGESGV.....  
Solyc06g062670\_S1IDD2 .....  
Solyc06g065440 .....  
Solyc06g072360\_S1IDD9 ..... SDLSENNNDTHRWRND.....VEGLRH.....  
Solyc06g075250\_S1IDD7 ..... RVLKKEEENKRNMSSETISSMYNNHNE..T  
Solyc07g053570\_S1IDD8 ..... AEQLSNTSSANISVPSLFSQQQIALSSPSA.....  
Solyc08g063040\_S1IDD16 ..... ATFFSPTTST.....  
Solyc08g080850 ..... FIPKTLDHVKDAEADVQRIISGEDTGD.....  
Solyc09g007550\_S1IDD13 ..... TN...TNTNT.....NTPATPN.....  
Solyc09g065670\_S1IDD15 ..... SIHFPISSSLFFYHDQHYVPVFRHGSFS.....  
Solyc09g074780\_S1IDD3 ..... TASSSINSPMMQKSFVTSAMAGPDISITR..P  
Solyc10g084180\_S1IDD14 ..... YNSLYSDSQN.....SQLTKQN.....  
Solyc11g017140 .....  
Solyc11g066420 .....  
Solyc11g069240\_S1IDD6 ..... RVLK.EEEENK.....TISPMYNN.....  
AT1G03840\_MGP/AtIDD3 ..... ANGATSLSVPSLFSVSDQITQDANAASAVA...  
AT1G14580\_BLJ/AtIDD6 ..... NSDQTGVPSLFTN.....  
AT1G25250\_FAL/AtIDD16 ..... ARTSAQARHNEK.RETSLTKERAN.....  
AT1G34370\_AtSTOP1 .....  
AT1G55110\_AtIDD7 ..... NGNLFPVVASSVNT.....GRSSFP.....  
AT1G68130\_AtIDD14 ..... TSLSLSIGTMDQ.KTMSEVEKKSYE.....  
AT2G01940\_SGR5/AtIDD15 ..... SSSYQHYNFDRIKEIMASEQIMKI.....  
AT2G02070\_RVN/AtIDD5 SGNLMISNHYDGENAVGGGGEGSTGLFPNNLMSSADRISSGSVPSLFSSSMQSPNSA...  
AT2G02080\_IME/AtIDD4 ..... KNSETSLPSLYSTD..VLVHREENLNAG...  
AT2G24990\_AtIDDa ..... YIPKSLDAVNNPEADVAKITSGQDTGD...  
AT3G13810\_AtIDD11 ..... N...PNPSNGGGG...GGSLFS.....  
AT3G45260\_1\_BIB/AtIDD9 ..... KNVISNGSLFSSEARNNTNYYNQNGG...  
AT3G50700\_AtIDD2 ..... HGSSFLGSN.....RFHA.....  
AT4G02670\_AtIDD12 ..... ALLQKATS.....  
AT5G03150\_JKD/AtIDD10 ..... HQTLDKSSFSPLF...SSSENKQNK.....  
AT5G22890\_STOP2 .....  
AT5G37350\_AtIDDb ..... YIPKSLDAVNNPEADVAKITSGQDTGD...  
AT5G44160\_NUC/AtIDD8 ..... LTTTTTSLAPSLSFSSDQPQANANSN...V...  
AT5G60470\_EGRET/AtIDD13 ..... KGNISGSNPTDGNIASLFSYNQEA.....  
AT5G66730\_ENY/AtIDD1 ..... FGPTIRDPP.....HFLTPLPP.....  
Os03g0197800\_OsIDD1 ..... ASSSLFTAPVP.....ADRQQFAPPPPPS...  
Os01g0195000\_OsIDD2 ..... LSFGFSSTSSAPPH.....P.A.....  
Os09g0555700\_OsIDD3 VDQFNG.....GAGNGGGG...SVTSSG..LAGNHGGGGGGGPPSLYNSSE..P  
Os02g0672100\_OsIDD4 TDQFSE.....GGGGGGGGGS...ETSAAALFGAGGNFSGGDHGHQVSPAGMYANDQ  
Os07g0581366\_OsIDD5 ..... APSSLFPQTNA.....SDPCSFAPP...  
Os08g0554400\_OsIDD6 PDQFNGVAAGNGARAGSGEHGNS...GNNADSGSIFSGNMMGGGGGFSLSYSSD..Q  
Os02g0518500\_OsIDD7 ..... KTSQDPISPILLKSFNNLTSSRDHMNIS..S  
Os01g0242200\_OsIDD8 ..... AKEAESVPSVFSNQHAKPAAPTD.....  
Os01g0935000\_OsIDD9 ..... VDAARDAAMVFPPPPPPAGSAAAI.....  
Os04g0566400\_OsIDD10 ..... DQFSC.....GAGGGGGLTRR...RRGSPAVTSLVATMFLQGSTTIKRCCR...  
Os01g0572300\_OsIDD11 ..... QSSATSAPPTTPQL.....PAA.....  
Os08g0467100\_OsIDD12 ..... RDDGNNSSSSSGEVSASATRLKAAHEQLRL...  
Os09g0449400\_OsIDD13 ..... DEVMGAAAGTSDEASAAAT.AKEQAREQLRQ...  
Os03g0237250\_OsIDD14 ..... AAVVAAASGGGGACAAAAGGEEQREEVRR...  
Os01g0888700\_OsIDDa ..... YIDQNAEEES.SDDDSTSEQDNEDGDVA..V  
Os01g0871200\_OsIDDb .....  
Os03g0838800\_OsIDDb .....  
Os04g0165200\_ART2 .....  
Os07g0162300\_OsIDDe ..... YVKQCEADIVNMSLMQRPSFANEPTAD...  
Os10g0419200\_Ehd2 ..... SSCNDDNSSIAGDVMVAAGGDSVSFG...  
Os08g0562300\_OsIDDe .....  
Os02g0572900\_STOP1 .....  
Os12g0170400\_DART1 .....

|                         | 250   | 260                                                       | 270            | 280       |
|-------------------------|-------|-----------------------------------------------------------|----------------|-----------|
| Solyc01g005060_S1IDD12  | ..... | VMADKAYAEFARRNAKREMEYAEREFENAKR.....                      |                | IRQQ      |
| Solyc01g007120          | ..... | DINNTNVKQLESDDLAKEDVN.....                                |                |           |
| Solyc01g099340_S1IDD10  | ..... | VQIPIQSNHDHDDQNETQ.....                                   | IGSILQG.....   | FGGSML    |
| Solyc02g062940_S1IDD17  | ..... | QPSMSATALLQKAAQMGATATN.....                               | SLLRGLG.....   | ILSS      |
| Solyc02g085580_S1IDD1   | ..... | QPAMSATALLQKAAQMGAAATS.....                               | SFLRGLG.....   | VMSS      |
| Solyc03g098070          | ..... | AISEKAYAEARQQAARQIELAEQEFANAKR.....                       |                | IRQQ      |
| Solyc03g121660_S1IDD11  | ..... | MASPHISATALLQKAAQMGATMSNKASTVSAVSSGPGPAM.....             |                | LMRPHQIH  |
| Solyc04g008500_S1IDD4   | ..... | PIMSATALLQKAAQMGSSSTS.....                                | NISA.....      | TA...     |
| Solyc04g056320_S1IDDb   | ..... | .....                                                     | .....          | .....     |
| Solyc04g080130_S1IDD18  | ..... | QPALSATALLQKAAQMGSTTSN.....                               | NSFLRGLG.....  | LAMS      |
| Solyc05g054030_S1IDD5   | ..... | AMEEKAMAIEKRQEAKCLIELANLEMAKAME.....                      |                | IRQS      |
| Solyc06g062670_S1IDD2   | ..... | VSPVHISATALLQKAAQFGATISNKASAVTATAAYTG..T.....             |                | AKIPHNTH  |
| Solyc06g065440          | ..... | .....                                                     | .....          | .....     |
| Solyc06g072360_S1IDD9   | ..... | ALAEKVYAEETRKEARREIELAEELSNARR.....                       |                | IRRQ      |
| Solyc06g075250_S1IDD7   | ..... | TAPATHMSATALLQKAAQMGSTRSN.....                            | SALFGTGF.....  | LMG.SS    |
| Solyc07g053570_S1IDD8   | ..... | NMSATALLQKAAQIGATTTT.....                                 | DPS.....       | I FLGN    |
| Solyc08g063040_S1IDD16  | ..... | TTGIAMSGSGSAGVARQYHPFE.....                               | NNNNNNNT.....  | NTDFVTG   |
| Solyc08g080850          | ..... | MY.Y.KTITGLKQALTAATNSSAEDQHLQIDELGQETAAAAAETNKPSD.....    |                | .....     |
| Solyc09g007550_S1IDD13  | ..... | PPIPMSATALLQKAAQMGSTKST.P.NYFSNTFG.....                   |                | VMHSSS    |
| Solyc09g065670_S1IDD15  | ..... | IPSPQLAATALLQRAATTMGNTSTVNVHVNSTMAH.....                  |                | LNRGTL    |
| Solyc09g074780_S1IDD3   | ..... | SPNYDNFQMQQDSNNHQSQSQNQN.....                             | LAAVIND.....   | MGIYSG    |
| Solyc10g084180_S1IDD14  | ..... | STTPMSATALLQKAAQMGSTKSN.QSTFFSNNFS.....                   |                | KLNSSS    |
| Solyc11g017140          | ..... | .....                                                     | .....          | .....     |
| Solyc11g066420          | ..... | .....                                                     | .....          | .....     |
| Solyc11g069240_S1IDD6   | ..... | SHMSATALLQAAQIGSTRSNNNSPLFSNQFG.....                      |                | LMTSSS    |
| AT1G03840_MGP/AtIDD3    | ..... | NMSATALLQKAAQMGATSSSTPTTTTITDQS.....                      |                | AYLQS     |
| AT1G14580_BLJ/AtIDD6    | ..... | .....                                                     | GADNN.....     | GPSA..... |
| AT1G25250_FAL/AtIDD16   | ..... | EEARKAEETRQEAKRQIEMAEKDFEKAKR.....                        |                | IREE      |
| AT1G34370_AtSTOP1       | ..... | .....                                                     | .....          | .....     |
| AT1G55110_AtIDD7        | ..... | HPSPMSATALLQKAAQMGSTKSTTPEEEERSS.....                     |                | RSSYNL    |
| AT1G68130_AtIDD14       | ..... | KGETSLEREARETRKQTEIAELEFAEAKR.....                        |                | IRQH      |
| AT2G01940_SGR5/AtIDD15  | ..... | AMKEKAYAEAKREARQREIAENEFANAKK.....                        |                | IRQK      |
| AT2G02070_RVN/AtIDD5    | ..... | PHMSATALLQKAAQMGSTSSN.....                                | NNNG.....      | SN...     |
| AT2G02080_IME/AtIDD4    | ..... | SNVSATALLQKATQMGSVTSN.....                                | DPSA.....      | LFRGL     |
| AT2G24990_AtIDDa        | ..... | MLY.QTITGLKDALPKIE.....                                   | EQKIEVNDE..... | .....     |
| AT3G13810_AtIDD11       | ..... | LASPMSATALLQKAAQMGSTKTPPLPPTTAYE.....                     |                | RSTHNN    |
| AT3G45260.1_BIB/AtIDD9  | ..... | QIASMSATALLQKAAQMGSKRSS.SSSSNSKTFG.....                   |                | LMTS.I    |
| AT3G50700_AtIDD2        | ..... | QPAMSATALLQKAAQMGAASSG.....                               | GSLHLGLG.....  | IVSS      |
| AT4G02670_AtIDD12       | ..... | LSSTTFGGGGQTR...SIGHHRHLTNVNEFLG.....                     |                | VDRVMM    |
| AT5G03150_UKD/AtIDD10   | ..... | PLSPMSATALLQKAAQMGSTRSN.SSTAPSFAG.....                    |                | PTMTSS    |
| AT5G22890_STOP2         | ..... | .....                                                     | .....          | .....     |
| AT5G37350_AtIDDb        | ..... | MLY.QTITGLKDALPKVD.....                                   | EQKIEVNAE..... | .....     |
| AT5G44160_NUC/AtIDD8    | ..... | NMSATALLQKAAEIGATSTT...TAAATNDPS.....                     |                | TFLQS     |
| AT5G60470_EGRET/AtIDD13 | ..... | NMASFSATLLQKVAQTGTP..S.SSETSTTMFG.....                    |                | QMTSSI    |
| AT5G66730_ENY/AtIDD1    | ..... | QPAMSATALLQKAAQMGSTGSG.....                               | GSLRGLG.....   | IVST      |
| Os03g0197800_OsIDD1     | ..... | PSPHMSATALLQKAAQMGATSSS.....                              | SFLRCLG.....   | LDMS      |
| Os01g0195000_OsIDD2     | ..... | ASSAHMSATALLQKAAQMGATLSRPSSSHAMAA.....                    |                | AAAATH    |
| Os09g0555700_OsIDD3     | ..... | AGTLPQMSATALLQKAAQMGATTSYNSAGGAGGASS.....                 |                | LLRGA     |
| Os02g0672100_OsIDD4     | ..... | AMMLPQMSATALLQKAAQMGSTSS.....                             | ANGAGAS.....   | VFGGG     |
| Os07g0581366_OsIDD5     | ..... | APHMSATALLQKAAEVBGASQSS.....                              | SFLKEFG.....   | LAAS      |
| Os08g0554400_OsIDD6     | ..... | TVPPPQMSATALLQKAAQMGATSS.....                             | GGAGSVNS.....  | LLRGL     |
| Os02g0518500_OsIDD7     | ..... | RSQDLSLGNSTVNSDCMKTTEDENSYMIGRGNILIN.....                 |                | APWSSG    |
| Os01g0242200_OsIDD8     | ..... | MSATALLQKAAQIGAVTST.....                                  | AAMPL.....     | VSPFE     |
| Os01g0935000_OsIDD9     | ..... | MSATALLQKAAELGATST.....                                   | GCGYGG.....    | VAFPA     |
| Os04g0566400_OsIDD10    | ..... | RCRRPALLQKAAQMG.ATSS.....                                 | ANGPGS.....    | MFRG.     |
| Os01g0572300_OsIDD11    | ..... | AAAAHLSATALLQKAAQMGATIGGAGTGAAGAH.....                    |                | YAHMASP   |
| Os08g0467100_OsIDD12    | ..... | AMAEKAAADEARAQAKRQELADQELATARR.....                       |                | MRYQ      |
| Os09g0449400_OsIDD13    | ..... | AMAEKEAAGEARAQARRQVELAEQELATARR.....                      |                | MRHQ      |
| Os03g0237250_OsIDD14    | ..... | ALEEKTAADAARERAREEAAAAAERALEDARR.....                     |                | ARHR      |
| Os01g0888700_OsIDDa     | ..... | KIGSLKIAEQDSAEVDPCTLASKDSNEPETFAKENETSTSCSGENNSINPSP..... |                | .....     |
| Os01g0871200_OsIDDb     | ..... | .....                                                     | .....          | .....     |
| Os03g0838800_OsIDDb     | ..... | .....                                                     | .....          | .....     |
| Os04g0165200_ART2       | ..... | .....                                                     | .....          | .....     |
| Os07g0162300_OsIDDe     | ..... | KLYNQPLLGFVRNKNKPTK...NQVQSEEP.....                       |                | .....     |
| Os10g0419200_Ehd2       | ..... | LTSEGSVTMHAGDVGRRRLTRDFLGVVDHDAG.....                     |                | EVDEL     |
| Os08g0562300_OsIDDF     | ..... | .....                                                     | .....          | .....     |
| Os02g0572900_STOP1      | ..... | .....                                                     | .....          | .....     |
| Os12g0170400_DART1      | ..... | .....                                                     | .....          | .....     |



Solyc01g005060\_S1IDD12 AQAELI.....  
Solyc01g007120 .....  
Solyc01g099340\_S1IDD10 QNNGDD.....HHKSSRV.....  
Solyc02g062940\_S1IDD17 SS.....SSSGQHEWNGRQID.....  
Solyc02g085580\_S1IDD1 TS.....SNGHQEWSGRPSD.....  
Solyc03g098070 AQAEL.....  
Solyc03g121660\_S1IDD11 VSATATAAESVSNATDFGLNLSSREDLPTGFFNSLAS.....  
Solyc04g008500\_S1IDD4 SLFKA.....FGSNTSGS.....  
Solyc04g056320\_S1IDDb .....  
Solyc04g080130\_S1IDD18 PS.....TSTPEENSLARRTN.....  
Solyc05g054030\_S1IDD5 VCASS.....  
Solyc06g062670\_S1IDD2 VSVTST..DSATKQTQQ..KLSSREDLTT.....  
Solyc06g065440 .....  
Solyc06g072360\_S1IDD9 AQMEL.....  
Solyc06g075250\_S1IDD7 FSKSNGQ.....GQFATHDQN.....  
Solyc07g053570\_S1IDD8 FSMNNCSNNNNKNDNNKFCGFVST.....  
Solyc08g063040\_S1IDD16 NTSFPDF.....GASVTPG.....  
Solyc08g080850 .....  
Solyc09g007550\_S1IDD13 SPSSNN.....TTQIFNNN.....  
Solyc09g065670\_S1IDD15 THVTPNG.....FLSPGSEN.....  
Solyc09g074780\_S1IDD3 ILMSND.....QNNDDGGY.....  
Solyc10g084180\_S1IDD14 SSSPNTF.....TFTSLQSCE.....  
Solyc11g017140 .....  
Solyc11g066420 .....  
Solyc11g069240\_S1IDD6 LSMKN.....SSSSSS.....  
AT1G03840\_MGP/AtIDD3 FASKS.NQIVEDGGSDR.FFASFGSNS.....  
AT1G14580\_BLJ/AtIDD6 TSSS.....SSSVVVDN.....  
AT1G25250\_FAL/AtIDD16 AKTEL.....  
AT1G34370\_AtSTOP1 .....  
AT1G55110\_AtIDD7 ITTTMAA.....MMTSPP.....  
AT1G68130\_AtIDD14 ARAEL.....  
AT2G01940\_SGR5/AtIDD15 AQAEL.....  
AT2G02070\_RVN/AtIDD5 TNNNN.....NASSILRS.....  
AT2G02080\_IME/AtIDD4 ASSSN.....SSSVIANH.....  
AT2G24990\_AtIDDa .....  
AT3G13810\_AtIDD11 LTTTMAA.....MMTSPSGFIS.....  
AT3G45260.1\_BIB/AtIDD9 FNKNQ.....  
AT3G50700\_AtIDD2 TS.....TSIDA.....  
AT4G02670\_AtIDD12 TSASSSE.....YDQLVVDG.....  
AT5G03150\_JKD/AtIDD10 SATASP.....PPRS.....  
AT5G22890\_STOP2 .....  
AT5G37350\_AtIDDb .....  
AT5G44160\_NUC/AtIDD8 FPLKSTDQTTSYDSGK.FFALFGSNN.....  
AT5G60470\_EGRET/AtIDD13 FNNTM.....  
AT5G66730\_ENY/AtIDD1 TS.....SSMELSNH.....  
Os03g0197800\_OsIDD1 SSSSAP.....PSSSGQQQHHHHHH.....QETMQVPLPASSLP.....  
Os01g0195000\_OsIDD2 NSSSSAA.....TTNAPPPP.....  
Os09g0555700\_OsIDD3 SSHG.....ISVGEGP.....  
Os02g0672100\_OsIDD4 FAGSSAPSSIPHGR.GTTMVDQGMHL.....  
Os07g0581366\_OsIDD5 TSSSPPSKLSQGRFTTGNTPTTSHPHPHPHPPHPQGRFMDNVPQPPPAKLPHRMFTD.....  
Os08g0554400\_OsIDD6 GSGGGGALNGKPAAGAAGFIMSGESS.....  
Os02g0518500\_OsIDD7 IMRPGT.....VPLIG.....  
Os01g0242200\_OsIDD8 PTKPGGATASPAD..ECGKFDGAALFA.....  
Os01g0935000\_OsIDD9 MGIAGGLDRLPAIGHHLAPYDDVVVPA.....  
Os04g0566400\_OsIDD10 FVGSS.....PHMRPAAQHMDQSDAHL.....  
Os01g0572300\_OsIDD11 AGAGAPA.....GGSATFGL.....  
Os08g0467100\_OsIDD12 AQVEL.....  
Os09g0449400\_OsIDD13 AQVEL.....  
Os03g0237250\_OsIDD14 ARGEL.....  
Os01g0888700\_OsIDDa .....  
Os01g0871200\_OsIDDb .....  
Os03g0838800\_OsIDDC .....  
Os04g0165200\_ART2 .....  
Os07g0162300\_OsIDDe .....  
Os10g0419200\_Ehd2 .....  
Os08g0562300\_OsIDDF .....  
Os02g0572900\_STOP1 .....  
Os12g0170400\_DART1 .....

|                         | 290              | 300        | 310          | 320                    |
|-------------------------|------------------|------------|--------------|------------------------|
| Solyc01g005060_SlIDD12  | ERAKQLKEEAINRISS | SILEIT     | HACKNK       | FQIDN                  |
| Solyc01g007120          | HQTGDDKDDNHQVGD  | ENDEP      | EEEEEE       | AESEDDPELEKSL          |
| Solyc01g099340_SlIDD10  | LQNEQGWFNNNNNNS  | TGLFNEK    | QRTLNEAG     | HSNEE                  |
| Solyc02g062940_SlIDD17  | TDGATLAAG        | LGLGLPCD   | DGSG         | LKELMLG                |
| Solyc02g085580_SlIDD1   | ANGASLAAG        | LGLGLPCD   | AGSG         | LKELMLG                |
| Solyc03g098070          | DKANALKEHAIKQIN  | STLSQIT    | CHSCKQK      | FQSTR                  |
| Solyc03g121660_SlIDD11  | YGNKAANP         | SAVITP     | VTIPLST      | APHPTPSTLQDMMS         |
| Solyc04g008500_SlIDD4   | SSSGTKSDHQAFNFG  | SDITD      | SGIINA       | YGGGSGHEGY             |
| Solyc04g056320_SlIDDb   | ALGHVKLESNINAE   | VPGLGIQLH  | GHS          | GFTDLMMGPSIS           |
| Solyc04g080130_SlIDD18  | SSS              | SHVMKIIKCS | SSCNKQFQSVSS |                        |
| Solyc05g054030_SlIDD5   | ITGPANNISGIMT    | SFNGFD     | SGTMFEDA     | ILFGGFNLSKKN           |
| Solyc06g062670_SlIDD2   | EKAQVLKEEAIRKIN  | FTLSQIT    | CYACKQK      | FQPKKT                 |
| Solyc06g072360_SlIDD9   | FNGLMMHSPNNNS    | NQGNRLL    | FQDMNST      | SLGNASGKNSDPFN         |
| Solyc06g075250_SlIDD7   | PTNNSISNSLGS     | DVDQSSSV   | NDFSA        | TIHPIQMYPKRRH          |
| Solyc07g053570_SlIDD8   | FMEQVHDMQNM      | MATTAP     | SLPCTSF      | DEGFGRGALMRQ           |
| Solyc08g063040_SlIDD16  | GESETETESDDDD    | DESDC      | SEGSSD       | GKPTAADKKAAR           |
| Solyc08g080850          | EIHQAF           | AQOTEDYN   | Q            | TENILINGCPNMNSVNSKAINL |
| Solyc09g007550_SlIDD13  | IPGNWQKRDNL      | TRDFLGLT   | GDH          | HHHHHDDHSSSAGSGVGG     |
| Solyc09g065670_SlIDD5   | IKNVTEVLD        | RDNHNSHT   | NDRVR        | NQTMVQNGSND            |
| Solyc10g084180_SlIDD14  | TTDQIFAKK        | SEDYTT     | SLLSQSN      | NGLFGCPNFTSSGINKSINL   |
| Solyc11g017140          | ASNVAIHENVQGN    | NGLLIG     | ATNSTTF      | VANNAN                 |
| Solyc11g069240_SlIDD6   | VELMSNNNGLHEI    | GNPRNG     | VTVVS        | GMGLQNPWKRRR           |
| AT1G03840_MGP/AtIDD3    | FG               | DCDHGNL    | QGLMNS       | LAATT                  |
| AT1G14580_BLJ/AtIDD6    | EKAHVVEEA        | IKRINAT    | MMEIT        | CHSCKQL                |
| AT1G25250_FAL/AtIDD16   | EPGF             | FQDY       | YMMNHQ       | HGGGEAFN               |
| AT1G34370_AtSTOP1       | EPGF             | FQDY       | YMMNHQ       | HGGGEAFN               |
| AT1G55110_AtIDD7        | EPGF             | FQDY       | YMMNHQ       | HGGGEAFN               |
| AT1G68130_AtIDD14       | HKAHLFRE         | EASRRIS    | ATMMQIT      | CHNCKQH                |
| AT2G01940_SGR5/AtIDD15  | ERAKFLKE         | QSMKKIS    | STIMQV       | TCTCKGQ                |
| AT2G02070_RVN/AtIDD5    | FGSGI            | YGENESN    | LQDL         | MNSFSNP                |
| AT2G02080_IME/AtIDD4    | FGGGR            | IMENDN     | NGNLQ        | GLMNSLA                |
| AT2G24990_AtIDDa        | EKEEE            | EGEED      | GESE         | ESEEESE                |
| AT3G13810_AtIDD11       | SNNNH            | VLFQ       | YNAS         | GFDNHGRE               |
| AT3G45260.1_BIB/AtIDD9  | AEN              | IKTKE      | VD           | ERG                    |
| AT3G50700_AtIDD2        |                  | IVPHG      | LGLGL        | PCG                    |
| AT4G02670_AtIDD12       | FTSTW            | QKADRL     | TRDFL        | GLT                    |
| AT5G03150_UKD/AtIDD10   | SSPM             | MIQQ       | LNNF         | NTNVLREN               |
| AT5G22890_STOP2         | EEE              | EEEE       | EGSG         | EES                    |
| AT5G37350_AtIDDb        | EEE              | EEEE       | EGSG         | EES                    |
| AT5G44160_NUC/AtIDD8    | NIGL             | MRS        | SHD          | HQEIENAR               |
| AT5G60470_EGRET/AtIDD13 | LNSY             | CLTAK      | N            | EEEE                   |
| AT5G66730_ENY/AtIDD1    | DALS             | LAPG       | LGLGL        | PCSSGGSG               |
| Os03g0197800_OsIDD1     | EWPPR            | LQPE       | PSPML        | SSG                    |
| Os01g0195000_OsIDD2     | PTS              | NVSST      | CVGAG        | GYGLAFEASHFIA          |
| Os09g0555700_OsIDD3     |                  | ANER       | SSYQ         | NLMGSMASGG             |
| Os02g0672100_OsIDD4     | QSL              | MNSL       | AGGN         | ADHQGMFG               |
| Os07g0581366_OsIDD5     | NSVQ             | QWHHRS     | NQQMEM       | EPGPMPLPGG             |
| Os08g0554400_OsIDD6     | RSTAS            | QTAENES    | QLRE         | LMNTLSATG              |
| Os02g0518500_OsIDD7     | LMNH             | PF         | SMRE         | EKDNPSIFPEN            |
| Os01g0242200_OsIDD8     | AASH             | H          | NAN          | LGGAMS                 |
| Os01g0935000_OsIDD9     | ALQ              | QTAT       | QLVGF        | DLGGLLPGLYGG           |
| Os04g0566400_OsIDD10    | NDL              | MNSL       | AGGG         | VNAAMFGGT              |
| Os01g0572300_OsIDD11    | GLS              | CLNTH      | QDGG         | GGGNLIPAGMMGL          |
| Os08g0467100_OsIDD12    | SRAH             | VRD        | HAIR         | QVDATQLQIT             |
| Os09g0449400_OsIDD13    | SRAH             | LRD        | HAVR         | QVNATLLQIT             |
| Os03g0237250_OsIDD14    | EKAL             | ALRD       | HAAR         | LIAQVT                 |
| Os01g0888700_OsIDDa     | SSNG             | DAKE       | P            | TESQDNDSDDDSD          |
| Os01g0871200_OsIDDb     |                  |            |              |                        |
| Os03g0838800_OsIDDC     |                  |            |              |                        |
| Os04g0165200_ART2       | LDL              | QNK        | SS           | EHSE                   |
| Os07g0162300_OsIDDe     | LDL              | QNK        | SS           | EHSE                   |
| Os10g0419200_Ehd2       | ADL              | STTAA      | ACQGC        | NFAAATTAACCAT          |
| Os08g0562300_OsIDDF     | ADL              | STTAA      | ACQGC        | NFAAATTAACCAT          |
| Os02g0572900_STOP1      |                  |            |              |                        |
| Os12g0170400_DART1      |                  |            |              |                        |

Solyc01g005060\_S1IDD12 .....NVDSSPPMSYMS...SDGE.....REQ...  
Solyc01g007120 .....KQRKKAIQAAHRGKRNFASTRNTYKDKGGKSSQNSKVHKLQSLGW  
Solyc01g099340\_S1IDD10 .....SLTLDFLGLGG.....MRHR...NLHEMHQHQQEMSFE  
Solyc02g062940\_S1IDD17 .....TPSVFGPKHPTLDDLGLGMA.AGGGSP...GLSALITSMGNLDVA  
Solyc02g085580\_S1IDD1 .....TPSVFGPKHPTLDDLGLGMA.ASVGSP...GLSALLTSMGNLDMV  
Solyc03g098070 .....VSIADENNSLALSYSISGLSEGHHE.....VAANNINQNEHL  
Solyc03g121660\_S1IDD11 .SNFEDPFSILNPKNNNGSGNDDMTKDFLGLRPLSHS.DIFNIAGLVNS.....TP.  
Solyc04g008500\_S1IDD4 .....NTTKLNLFEQNQPPQKKQ.LTRDFLGV.....GEIVRSMNG..RFSTQR  
Solyc04g056320\_S1IDDb .....HQTSMFMFGSKPPTLDFLGLGNG.ASG..TPSNGFSAFLSSMEDGFGVV  
Solyc04g080130\_S1IDD18 .....SKDATLTNNYYLSSSIYRR.....  
Solyc05g054030\_S1IDD5 .....EDEDQQLYFNGSMNEEDHILTKDFLGLKPLSHTDDIFNIAALVN.....  
Solyc06g062670\_S1IDD2 .....  
Solyc06g080850 .....TTTTTR.....TTSIDQNIHL  
Solyc06g072360\_S1IDD9 LMPRNNKKGQVNLSGNEA.MEGGLTRDFLGVGGN.....ESRPFLSK.NELAKFGNIS  
Solyc06g075250\_S1IDD7 .....IQIEDSVKGVVEVGAGGGAGGQTRDFLGVG.....VQSICHPSINGLI  
Solyc07g053570\_S1IDD8 .....GKENN.....EGLTRDFLGLRAFPHHRDFLSTTTPAALHYNMGSSAAA  
Solyc08g063040\_S1IDD16 .....KENKKVKEEKREARKHKVPAKVKKKKKLAKAKKYR.....  
Solyc08g080850 QALLQTTGGMHN.QNVHFN.LHNSLTRDFLGMGNE.....GGQPFPLPQ..ELAKFASIN  
Solyc09g007550\_S1IDD13 .....GGGGQVLPFTNGNVGNLGLLSYGGNRMQDFQQTLYERDINSVLKHHPLGFGFAGA  
Solyc09g065670\_S1IDD5 .....MLTVDFLGLGG.....ASRAPISNLQEQRRFEAAINQQ  
Solyc09g074780\_S1IDD3 EAIMQTVGMHNTQAVSMNGMDNCLTRDFLGLKHE.....GNCQFLPQ..EIVKFAFMN  
Solyc10g084180\_S1IDD14 .....  
Solyc11g017140 .....  
Solyc11g066420 .....  
Solyc11g069240\_S1IDD6 LMMMQDKGK.....QGNLTRDFLGGGRN.....EKRLFQOQTHEMAKFENNK  
AT1G03840\_MGP/AtIDD3 .....VDIG.NAGGGGQTRDFLGVG.....VQTICHSSSINGWI  
AT1G14580\_BLJ/AtIDD6 .....SLFDLHFANNLSMGGSDR.LTLDFLGVN.....GGIVSTVN.....GRG  
AT1G25250\_FAL/AtIDD16 .....VTADESTSLVMSYVSSATTEGE.....CE.....  
AT1G34370\_AtSTOP1 .....  
AT1G55110\_AtIDD7 .....GEEKNDVDDGGGETRDFLGLRSLMSHNEILSFANLGN.....CLN  
AT1G68130\_AtIDD14 .....QTHCTDESTSLAVSYMSSATTEGE.....KASDRA  
AT2G01940\_SGR5/AtIDD15 .....AATADETSLVVSYMSSANTDGE.....LENGF.  
AT2G02070\_RVN/AtIDD5 .....DSPFGSYGGVKNGLSADKQSMTRDFLGV.....GQIVKSMSSGSGGFGQQQ  
AT2G02080\_IME/AtIDD4 .....SIFDVQFGDNGNMSGSDK.LTLDFLGV.....GGMVNVNRRGGGGGGRG  
AT2G24990\_AtIDDa .....KEHKKVKEEKRESRKTTPKSVKRRKKKVKSPHKTR.....  
AT3G13810\_AtIDD11 .....TAAAGSEKSTKSGGEGLTRDFLGLRPLMSHNEILSFAG.LGS.....CIN  
AT3G45260\_1\_BIB/AtIDD9 .....FTRDFLGVGSQHRSPWLLMVNHNLPDSSPPASTDGT  
AT3G50700\_AtIDD2 .....NSSVFGPKQTLDFLGLGRA.VGNGNGPSNGLS...TLVGGGTGID  
AT4G02670\_AtIDD12 .....GHGGHVS.....VRPDMLEYAGG..VAFPMASAYDTE...HDSFPQKAYD  
AT5G03150\_UKD/AtIDD10 PFQSNRSGLNP..AQQMG.....LTRDFLGVSNHHP.HQTGRPPFLPQ..ELARFAPLG  
AT5G22890\_STOP2 .....  
AT5G37350\_AtIDDb .....KEHKKVKEEKRESRKTTPKSVKRRKKKVKSPHKTR.....  
AT5G44160\_NUC/AtIDD8 .....VDGGGEVGGGGQTRDFLGVG.....VQTLCHPSSINGWI  
AT5G60470\_EGRET/AtIDD13 .....LTRDFLGVGSSD..QQLRHRHFPSSVPLTANHDIP  
AT5G66730\_ENY/AtIDD1 .....NSSVFGPKQTLDFLGLGRA.VGNGGNTGGGLSALLTSIGGGGID  
Os03g0197800\_OsIDD1 .....QSTLFSAKPATLDFLGLGV.SPTGASTSRG.FPFTFIQPIGGAVSLA  
Os01g0195000\_OsIDD2 .....RDTGNGVAGAGNDGLTRDFLGLRAFSHG.NIMSMAGFDP...CMSTTSAS  
Os09g0555700\_OsIDD3 .....SFSGASGFGAVDDGKLS.TRDFLGVGVV.....QGISGSAAMGPPRHG.A  
Os02g0672100\_OsIDD4 .....EVKFSLQRGGGGG...GDGDVTRDFLGVG.....GGFMRGMSMARGEHHGG  
Os07g0581366\_OsIDD5 .....PSALYGPKPATLDFLGLGIGGTMGGSTANGGLPALM..VGGELDMG  
Os08g0554400\_OsIDD6 .....VFVGG.GFPG.VDDGKLS.TRDFLGV.....SGGAPGLQLRHGGA  
Os02g0518500\_OsIDD7 .....GLTQDFLGLGGSGT..LDMSETYNADVITALSYSEDE  
Os01g0242200\_OsIDD8 .....HAGLKDAGGVGRETRDFLGVG.....VQALCS.SSIHGWI  
Os01g0935000\_OsIDD9 .....GDQHAGVVDRRRREGVVRVVDYMGVDDDDDDH.....GCFDGVGPF.GPHGPWA  
Os04g0566400\_OsIDD10 .....EVKFSQGGGGGAGAGGTGTRDFLGVG.....GGIVHGMSTPRGDHHS  
Os01g0572300\_OsIDD11 .....GEDVAGAGGGGGMTRDFLGLRAFSHR.DIL.LAGFDSS...CMGHVNAA  
Os08g0467100\_OsIDD12 .....AMISSDVAS.YVSSVTEGGDAEVDNDGNLHRRRLNADDGMPRGHS  
Os09g0449400\_OsIDD13 .....AAMSSDVASYSVSSVTEGGDADDP.....LDVVDATRRRLQ  
Os03g0237250\_OsIDD14 .....MAAIDGHGASAVAREHLRGG.....GVGAGI.  
Os01g0888700\_OsIDDa .....KQRKRAIAAAHRRRPISSRNAYKYKG.KGTMNSKIERQACKW  
Os01g0871200\_OsIDDb .....  
Os03g0838800\_OsIDDC .....  
Os04g0165200\_ART2 .....  
Os07g0162300\_OsIDDe .....KENKKVKAEKREARKDKIPKAEKKKKRMMAKAKCKR.....  
Os10g0419200\_Ehd2 .....RLPPVNETWSHNF.....  
Os08g0562300\_OsIDDF .....  
Os02g0572900\_STOP1 .....  
Os12g0170400\_DART1 .....

Solyc01g005060\_S1IDD12 .....  
 Solyc01g007120 .....  
 Solyc01g099340\_S1IDD10 QQQVN.....HQSIQRVNS.....IWDD  
 Solyc02g062940\_S1IDD17 AAARPFDSGEFC.....GKEFGRSS  
 Solyc02g085580\_S1IDD1 TSAGSFGSADFS.....GKDLGRNS  
 Solyc03g098070 KLSQL.....  
 Solyc03g121660\_S1IDD11 .NETQSQ.....NHKTWQS  
 Solyc04g008500\_S1IDD4 EQQQQN.....NGLNNMSSLLDPERNQIQSFG...SATND  
 Solyc04g056320\_S1IDDb .....  
 Solyc04g080130\_S1IDD18 AEP.....WDDPS.....DRKPAML  
 Solyc05g054030\_S1IDD5 .....  
 Solyc06g062670\_S1IDD2 ...TEFK.....NHKTWQS  
 Solyc06g065440 .....  
 Solyc06g072360\_S1IDD9 KV.....  
 Solyc06g075250\_S1IDD7 ASAMGLS.....DYSETH  
 Solyc07g053570\_S1IDD8 .....  
 Solyc08g063040\_S1IDD16 AAPASFD.....QHSHHHQONQ.....NQLPWQN  
 Solyc08g080850 .....  
 Solyc09g007550\_S1IDD13 .SAMGLS.....HYSTGH  
 Solyc09g065670\_S1IDD15 GAGAGAAAD.....STGTWGDC  
 Solyc09g074780\_S1IDD3 RLQASSS.....FHHQQNINHNSGLEKPIWDV  
 Solyc10g084180\_S1IDD14 SSAMGLS.....HLQ  
 Solyc11g017140 .....  
 Solyc11g066420 .....  
 Solyc11g069240\_S1IDD6 .....  
 AT1G03840\_MGP/AtIDD3 .....  
 AT1G14580\_BLJ/AtIDD6 .....  
 AT1G25250\_FAL/AtIDD16 .....  
 AT1G34370\_AtSTOP1 .....  
 AT1G55110\_AtIDD7 TSATEQQ.....QQQSHQD  
 AT1G68130\_AtIDD14 SS.....  
 AT2G01940\_SGR5/AtIDD15 .....  
 AT2G02070\_RVN/AtIDD5 QQQQQQQQQQHGNRSRERVGSSSDSADRSMNVNTGGGPASTSPPYGIHHASF  
 AT2G02080\_IME/AtIDD4 S.....ARGGVSLDGEAKFPEQNYPPFGRG  
 AT2G24990\_AtIDDa .....  
 AT3G13810\_AtIDD11 SSASDQL.....HPKPWQG  
 AT3G45260.1\_BIB/AtIDD9 TADMNQ.....  
 AT3G50700\_AtIDD2 MAT.TFGSGEFS.....GKDISRRKS  
 AT4G02670\_AtIDD12 HLGFSGAHR.....M  
 AT5G03150\_JKD/AtIDD10 .....  
 AT5G22890\_STOP2 .....  
 AT5G37350\_AtIDDb .....  
 AT5G44160\_NUC/AtIDD8 .....  
 AT5G60470\_EGRET/AtIDD13 KLAATIV.....GRKQP  
 AT5G66730\_ENY/AtIDD1 L.....FGSGEFS.....GKDIGRSS  
 Os03g0197800\_OsIDD1 GSATVAEETFGAA.....HGGQANPWERNPSSSPL  
 Os01g0195000\_OsIDD2 S.AAPYD.....HHHH.....SNKPWHS  
 Os09g0555700\_OsIDD3 AG.....L.HVGSLDPANMN  
 Os02g0672100\_OsIDD4 GG.....SDMHGILEAEMKSASSSFNGGRMQ  
 Os07g0581366\_OsIDD5 SAQAPWEEA.....KRKTNGRTIL  
 Os08g0554400\_OsIDD6 AG.....MGMAGSLDQEMK  
 Os02g0518500\_OsIDD7 KPQEHY.....SYHQSSLDPTA.LEKPIWDS  
 Os01g0242200\_OsIDD8 .....  
 Os01g0935000\_OsIDD9 .....  
 Os04g0566400\_OsIDD10 S.....SDMS.SLEAEMKSASS.FNGRRMP  
 Os01g0572300\_OsIDD11 AGMAGYEP PPPHHGQPQHQQHQQQQQQGGGNSNEPWHGMGSHS  
 Os08g0467100\_OsIDD12 RTMAMD LN  
 Os09g0449400\_OsIDD13 HANSMGIM  
 Os03g0237250\_OsIDD14 .....  
 Os01g0888700\_OsIDDa .....  
 Os01g0871200\_OsIDDb .....  
 Os03g0838800\_OsIDDC .....  
 Os04g0165200\_ART2 .....  
 Os07g0162300\_OsIDDe .....  
 Os10g0419200\_Ehd2 .....  
 Os08g0562300\_OsIDDF .....  
 Os02g0572900\_STOP1 .....  
 Os12g0170400\_DART1 .....
