# Supplementary material for: Functional characterization of plant specific Indeterminate Domain (IDD) transcription factors in tomato (Solanum lycopersicum L.)
Source: Springer Nature journal article supplement (doi:10.1038/s41598-024-58903-0), 2024-04-05
Supplement: 41598_2024_58903_MOESM2_ESM.pdf [file 41598_2024_58903_MOESM2_ESM.pdf]

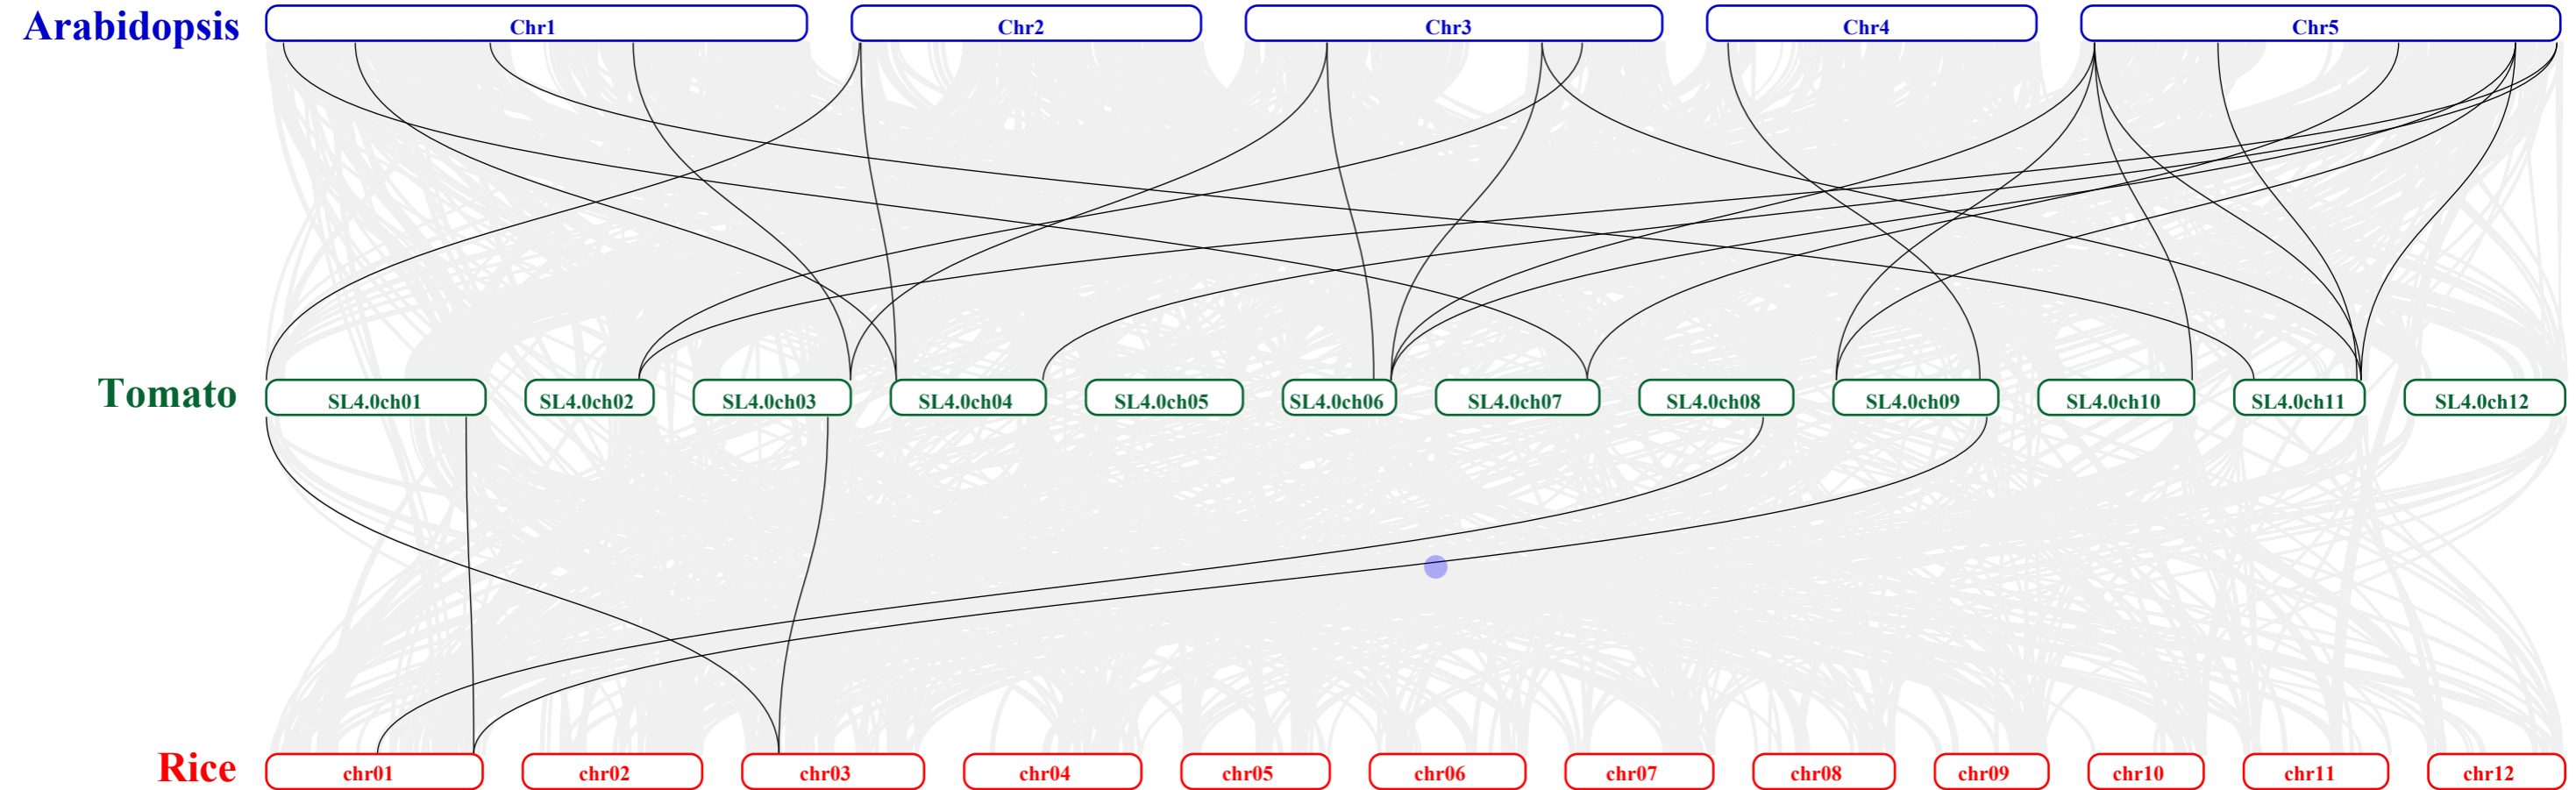

Figure S2. The synteny analysis of SIIDD family genes. Synteny analysis of IDD genes between rice, tomato, and Arabidopsis. Gray lines: all collinear blocks within tomato and other plant genomes. Red lines: the synteny of IDD gene pairs. The species names with the prefixes Os, Sl, and At indicate rice, tomato, and Arabidopsis, respectively.
