# Supplementary material for: Functional characterization of plant specific Indeterminate Domain (IDD) transcription factors in tomato (Solanum lycopersicum L.)
Source: Springer Nature journal article supplement (doi:10.1038/s41598-024-58903-0), 2024-04-05
Supplement: 41598_2024_58903_MOESM3_ESM.pdf [file 41598_2024_58903_MOESM3_ESM.pdf]

Tree scale: 1

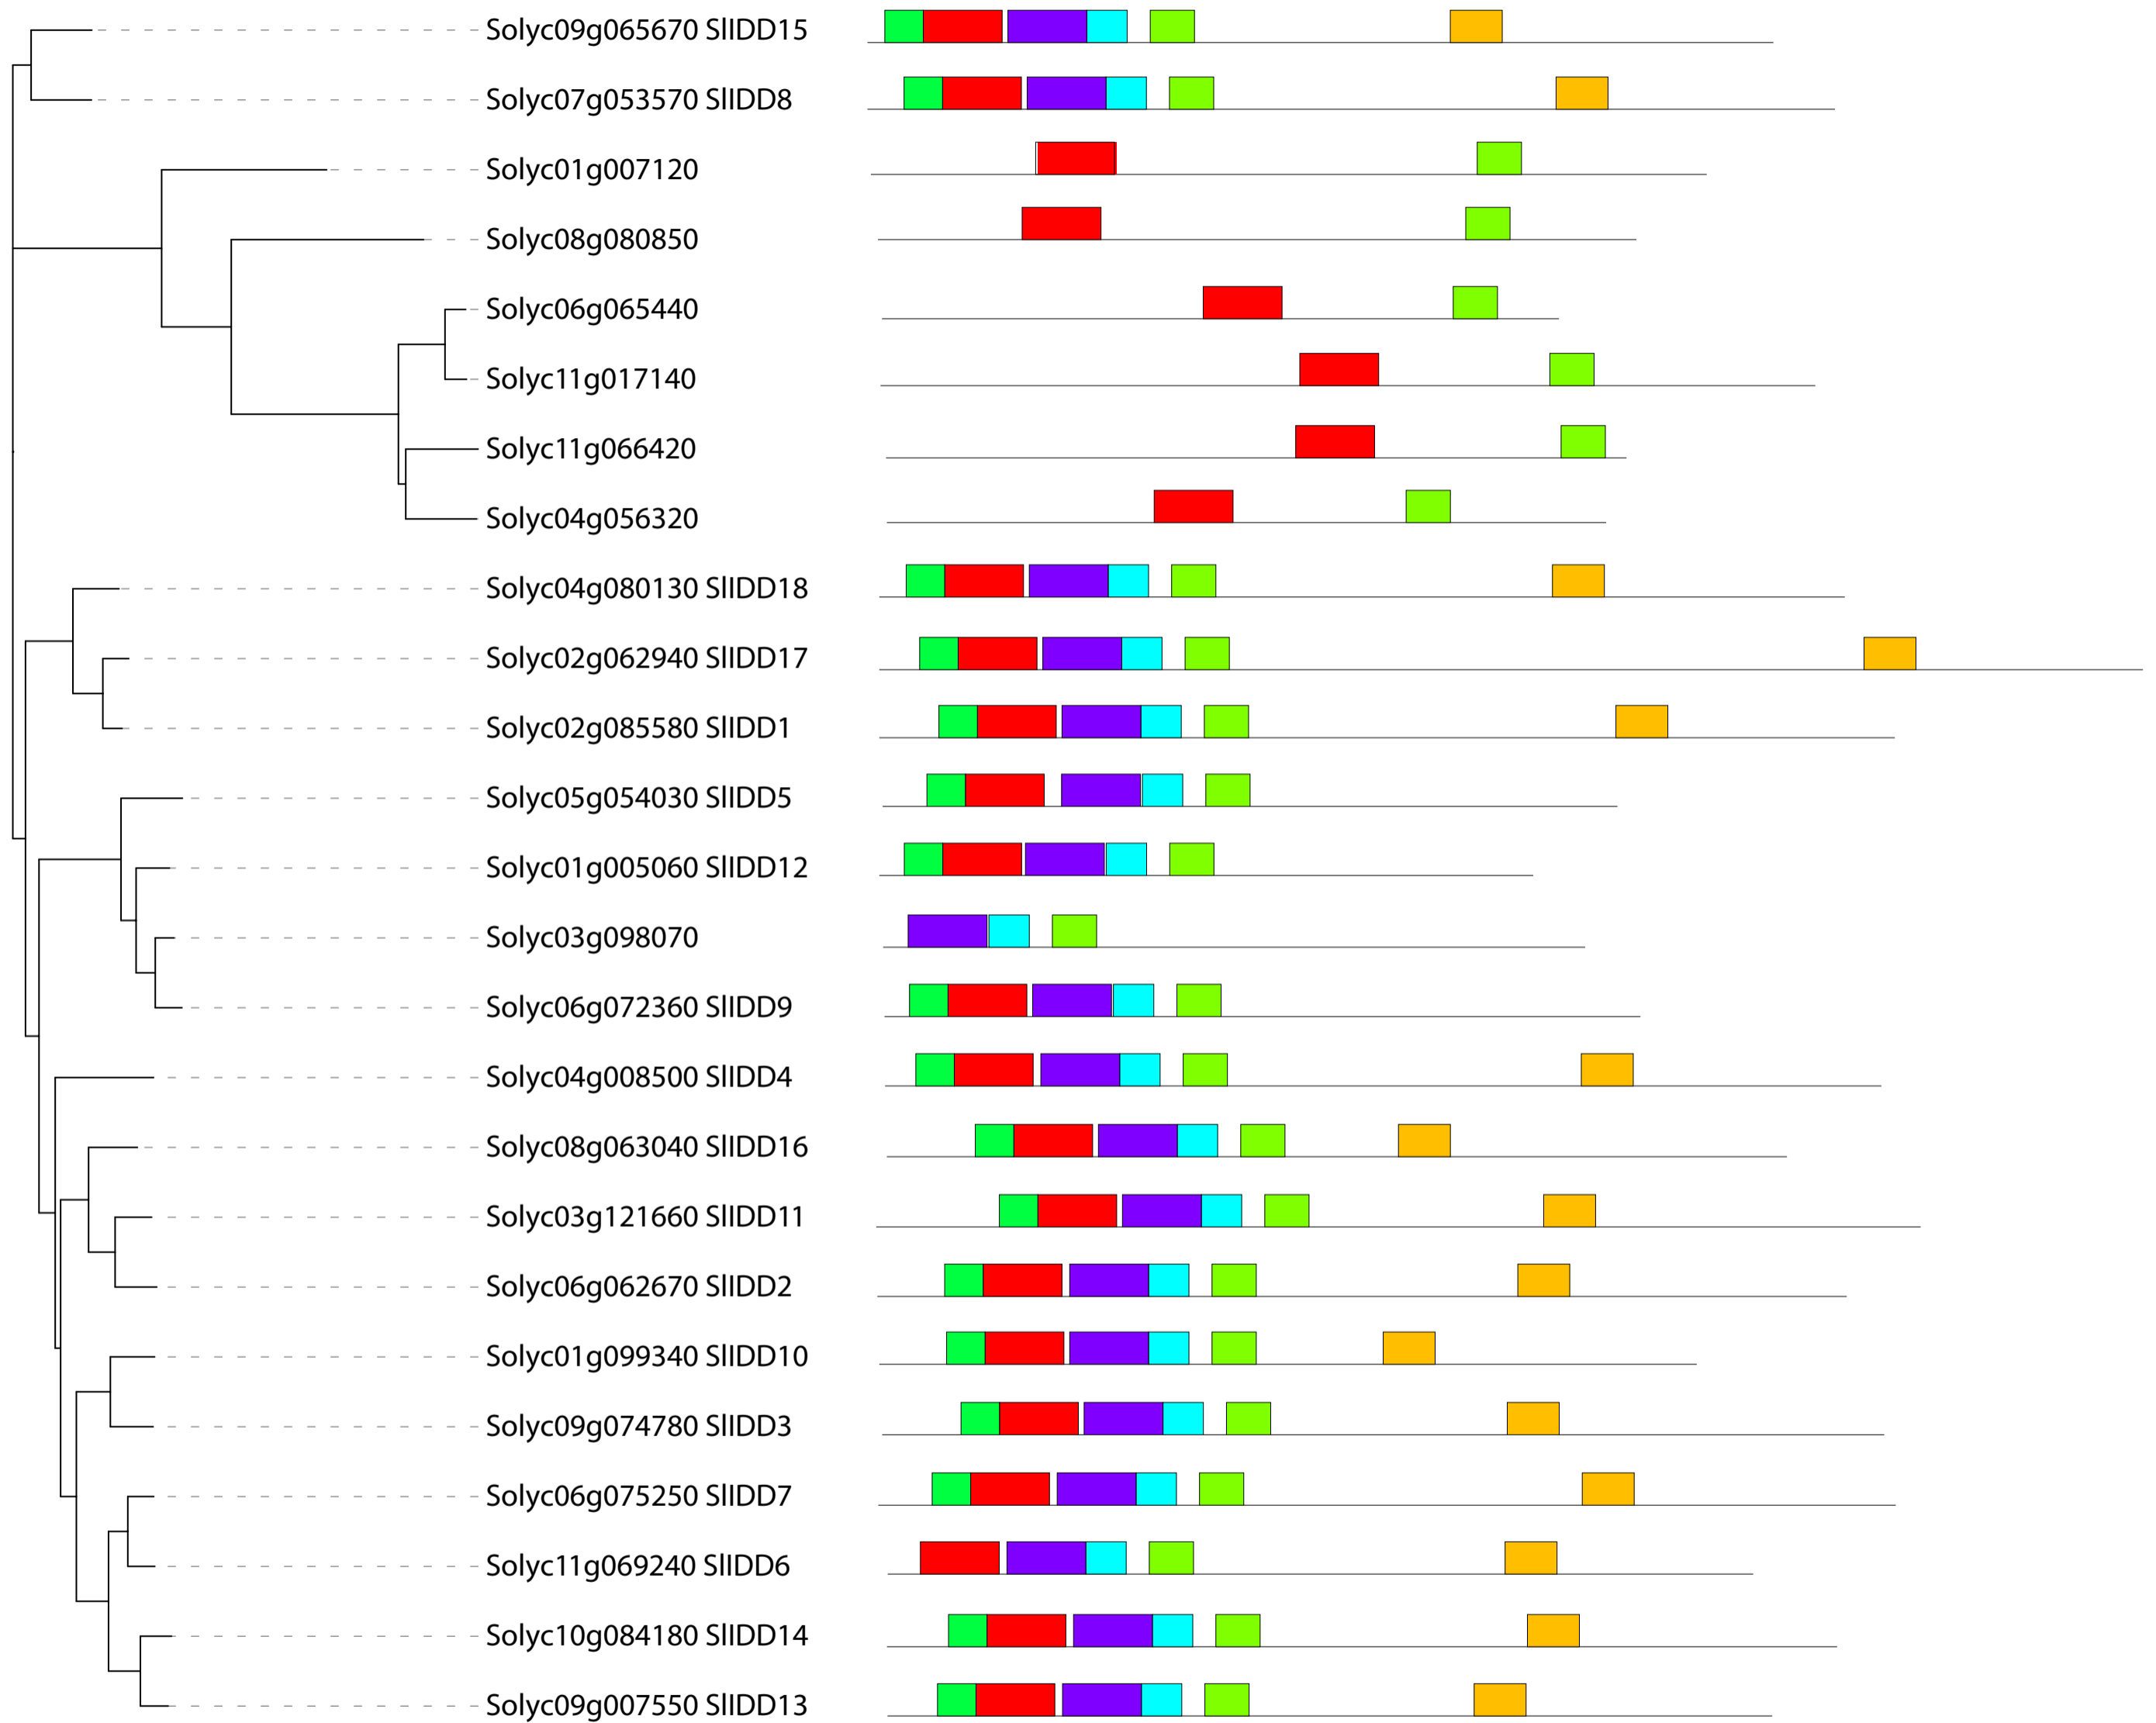

Figure S3. Motif analysis of Tomato IDD-like transcription factors. Sequences with 4 conserved C-terminus motifs were named as *IDDs*.
